# Supplementary material for: Chloroquine Phosphate Targets the MAPK-ERK Pathway to Inhibit ASFV SY- 1 Replication In Vitro
Source: Research Square preprint supplement (doi:10.21203/rs.3.rs-8029940/v1), 2025-11-24
Supplement: Supplementary file 1 [file 27487ad057672369d5b17d4d.xlsx]

## Sheet: Sheet1
Supplementary Table 4: Identification of viral protein in CQP group
Checked	Master	Accession	Description	Coverage [%]	# PSMs	# Unique Peptides	# AAs	MW [kDa]	calc. pI	Score Sequest HT: Sequest HT	# Peptides (by Search Engine): Sequest HT	# Protein Groups
FALSE	Master Protein	lcl	[protein=G1211R] [protein_id=UYC33164.1] [location=113199..116819] [gbkey=CDS]	2	2	2	1206	139.4	8.18	1.52	2	1
	Checked	Sequence	Modifications	# Protein Groups	# Proteins	# PSMs	Master Protein Accessions	Master Protein Descriptions	# Missed Cleavages	Theo. MH+ [Da]	Sequence Length	Confidence (by Search Engine): Sequest HT	RT [min] (by Search Engine): Sequest HT	XCorr (by Search Engine): Sequest HT
	FALSE	GIDIIK		1	1	1	lcl	[protein=G1211R] [protein_id=UYC33164.1] [location=113199..116819] [gbkey=CDS]	0	658.413	6	High	27.6748	1.52
	FALSE	LVEGWFVRHNNVPDK		1	1	1	lcl	[protein=G1211R] [protein_id=UYC33164.1] [location=113199..116819] [gbkey=CDS]	1	1809.94	15	Medium	21.2627	1.03
FALSE	Master Protein	lcl	[protein=F778R] [protein_id=UYC33119.1] [location=57021..59357] [gbkey=CDS]	2	1	1	778	87.3	8.41	0	1	1
	Checked	Sequence	Modifications	# Protein Groups	# Proteins	# PSMs	Master Protein Accessions	Master Protein Descriptions	# Missed Cleavages	Theo. MH+ [Da]	Sequence Length	Confidence (by Search Engine): Sequest HT	RT [min] (by Search Engine): Sequest HT	XCorr (by Search Engine): Sequest HT
	FALSE	LSPQFVDVVYKYK		1	1	1	lcl	[protein=F778R] [protein_id=UYC33119.1] [location=57021..59357] [gbkey=CDS]	1	1585.86	13	Medium	40.3396	0.87
FALSE	Master Protein	lcl	[protein=MGF_300-1L] [protein_id=UYC33087.1] [location=complement(19742..20548)] [gbkey=CDS]	5	1	1	268	31.3	8.24	0	1	1
	Checked	Sequence	Modifications	# Protein Groups	# Proteins	# PSMs	Master Protein Accessions	Master Protein Descriptions	# Missed Cleavages	Theo. MH+ [Da]	Sequence Length	Confidence (by Search Engine): Sequest HT	RT [min] (by Search Engine): Sequest HT	XCorr (by Search Engine): Sequest HT
	FALSE	TLLSWGASPEYAR		1	1	1	lcl	[protein=MGF_300-1L] [protein_id=UYC33087.1] [location=complement(19742..20548)] [gbkey=CDS]	0	1450.73	13	Medium	37.5359	0.81
FALSE	Master Protein	lcl	[protein=MGF_505-4R] [protein_id=UYC33100.1] [location=35810..37330] [gbkey=CDS]	3	1	1	506	59.3	7.4	0	1	1
	Checked	Sequence	Modifications	# Protein Groups	# Proteins	# PSMs	Master Protein Accessions	Master Protein Descriptions	# Missed Cleavages	Theo. MH+ [Da]	Sequence Length	Confidence (by Search Engine): Sequest HT	RT [min] (by Search Engine): Sequest HT	XCorr (by Search Engine): Sequest HT
	FALSE	KNYPDMIQYIEILSK		1	1	1	lcl	[protein=MGF_505-4R] [protein_id=UYC33100.1] [location=35810..37330] [gbkey=CDS]	1	1854.97	15	Medium	37.8815	1.12
FALSE	Master Protein	lcl	[protein=MGF_300-4L] [protein_id=UYC33088.1] [location=complement(21948..22940)] [gbkey=CDS]	3	1	1	330	39.5	9.2	0	1	1
	Checked	Sequence	Modifications	# Protein Groups	# Proteins	# PSMs	Master Protein Accessions	Master Protein Descriptions	# Missed Cleavages	Theo. MH+ [Da]	Sequence Length	Confidence (by Search Engine): Sequest HT	RT [min] (by Search Engine): Sequest HT	XCorr (by Search Engine): Sequest HT
	FALSE	MQSLFNIALK	1xOxidation [M1]	1	1	1	lcl	[protein=MGF_300-4L] [protein_id=UYC33088.1] [location=complement(21948..22940)] [gbkey=CDS]	0	1180.64	10	Medium	29.565	0.86
FALSE	Master Protein	lcl	[protein=MGF_505-10R] [protein_id=UYC33105.1] [location=44582..46210] [gbkey=CDS]	1	1	1	542	63.1	8.78	0	1	1
	Checked	Sequence	Modifications	# Protein Groups	# Proteins	# PSMs	Master Protein Accessions	Master Protein Descriptions	# Missed Cleavages	Theo. MH+ [Da]	Sequence Length	Confidence (by Search Engine): Sequest HT	RT [min] (by Search Engine): Sequest HT	XCorr (by Search Engine): Sequest HT
	FALSE	KNDIIR		1	1	1	lcl	[protein=MGF_505-10R] [protein_id=UYC33105.1] [location=44582..46210] [gbkey=CDS]	1	758.452	6	Medium	12.0388	0.84
FALSE	Master Protein	lcl	[protein=MGF_360-10L] [protein_id=UYC33091.1] [location=complement(25413..26450)] [gbkey=CDS]	3	1	1	345	40.3	7.58	0	1	1
	Checked	Sequence	Modifications	# Protein Groups	# Proteins	# PSMs	Master Protein Accessions	Master Protein Descriptions	# Missed Cleavages	Theo. MH+ [Da]	Sequence Length	Confidence (by Search Engine): Sequest HT	RT [min] (by Search Engine): Sequest HT	XCorr (by Search Engine): Sequest HT
	FALSE	KKIMHMFFK	2xOxidation [M4; M6]	1	1	1	lcl	[protein=MGF_360-10L] [protein_id=UYC33091.1] [location=complement(25413..26450)] [gbkey=CDS]	2	1241.65	9	Medium	55.0214	1.1
FALSE	Master Protein	lcl	[protein=MGF_360-1L] [protein_id=UYC33052.1] [location=complement(856..1689)] [gbkey=CDS]	3	1	1	277	32.5	5.12	0	1	1
	Checked	Sequence	Modifications	# Protein Groups	# Proteins	# PSMs	Master Protein Accessions	Master Protein Descriptions	# Missed Cleavages	Theo. MH+ [Da]	Sequence Length	Confidence (by Search Engine): Sequest HT	RT [min] (by Search Engine): Sequest HT	XCorr (by Search Engine): Sequest HT
	FALSE	KALSENK		1	1	1	lcl	[protein=MGF_360-1L] [protein_id=UYC33052.1] [location=complement(856..1689)] [gbkey=CDS]	1	789.446	7	Medium	9.3177	1.01
FALSE	Master Protein	lcl	[protein=D250R] [protein_id=UYC33176.1] [location=137523..138275] [gbkey=CDS]	2	1	1	250	29.8	8.84	0	1	1
	Checked	Sequence	Modifications	# Protein Groups	# Proteins	# PSMs	Master Protein Accessions	Master Protein Descriptions	# Missed Cleavages	Theo. MH+ [Da]	Sequence Length	Confidence (by Search Engine): Sequest HT	RT [min] (by Search Engine): Sequest HT	XCorr (by Search Engine): Sequest HT
	FALSE	IAEISK		1	1	1	lcl	[protein=D250R] [protein_id=UYC33176.1] [location=137523..138275] [gbkey=CDS]	0	660.393	6	Medium	18.2003	0.88
FALSE	Master Protein	lcl	[protein=EP364R] [protein_id=UYC33133.1] [location=74546..75655] [gbkey=CDS]	3	1	1	369	41.3	9.04	0	1	1
	Checked	Sequence	Modifications	# Protein Groups	# Proteins	# PSMs	Master Protein Accessions	Master Protein Descriptions	# Missed Cleavages	Theo. MH+ [Da]	Sequence Length	Confidence (by Search Engine): Sequest HT	RT [min] (by Search Engine): Sequest HT	XCorr (by Search Engine): Sequest HT
	FALSE	KTYKDFAASLK		1	1	1	lcl	[protein=EP364R] [protein_id=UYC33133.1] [location=74546..75655] [gbkey=CDS]	2	1271.7	11	Medium	20.1055	1.29
FALSE	Master Protein	lcl	[protein=MGF_110-7L] [protein_id=UYC33066.1] [location=complement(9356..9769)] [gbkey=CDS]	4	1	1	137	15.9	5.83	0	1	1
	Checked	Sequence	Modifications	# Protein Groups	# Proteins	# PSMs	Master Protein Accessions	Master Protein Descriptions	# Missed Cleavages	Theo. MH+ [Da]	Sequence Length	Confidence (by Search Engine): Sequest HT	RT [min] (by Search Engine): Sequest HT	XCorr (by Search Engine): Sequest HT
	FALSE	KNEHPR		1	1	1	lcl	[protein=MGF_110-7L] [protein_id=UYC33066.1] [location=complement(9356..9769)] [gbkey=CDS]	1	780.411	6	Medium	12.1154	0.77
FALSE	Master Protein	lcl	[protein=ASFV_G_ACD_00520] [protein_id=UYC33099.1] [location=complement(35720..35842)] [gbkey=CDS]	25	1	1	40	4.8	9.88	0	1	1
	Checked	Sequence	Modifications	# Protein Groups	# Proteins	# PSMs	Master Protein Accessions	Master Protein Descriptions	# Missed Cleavages	Theo. MH+ [Da]	Sequence Length	Confidence (by Search Engine): Sequest HT	RT [min] (by Search Engine): Sequest HT	XCorr (by Search Engine): Sequest HT
	FALSE	TVVHWFEISK		1	1	1	lcl	[protein=ASFV_G_ACD_00520] [protein_id=UYC33099.1] [location=complement(35720..35842)] [gbkey=CDS]	0	1245.66	10	Medium	32.5378	0.82
FALSE	Master Protein	lcl	[protein=C962R] [protein_id=UYC33145.1] [location=89102..91990] [gbkey=CDS]	1	1	1	962	111.3	7.39	0	1	1
	Checked	Sequence	Modifications	# Protein Groups	# Proteins	# PSMs	Master Protein Accessions	Master Protein Descriptions	# Missed Cleavages	Theo. MH+ [Da]	Sequence Length	Confidence (by Search Engine): Sequest HT	RT [min] (by Search Engine): Sequest HT	XCorr (by Search Engine): Sequest HT
	FALSE	LAASTK		1	1	1	lcl	[protein=C962R] [protein_id=UYC33145.1] [location=89102..91990] [gbkey=CDS]	0	590.351	6	Medium	16.1264	0.93
FALSE	Master Protein	lcl	[protein=NP419L] [protein_id=UYC33174.1] [location=complement(133536..134795)] [gbkey=CDS]	2	2	1	419	48.1	9.31	0	1	1
	Checked	Sequence	Modifications	# Protein Groups	# Proteins	# PSMs	Master Protein Accessions	Master Protein Descriptions	# Missed Cleavages	Theo. MH+ [Da]	Sequence Length	Confidence (by Search Engine): Sequest HT	RT [min] (by Search Engine): Sequest HT	XCorr (by Search Engine): Sequest HT
	FALSE	VTEGKNLGK		1	1	2	lcl	[protein=NP419L] [protein_id=UYC33174.1] [location=complement(133536..134795)] [gbkey=CDS]	1	945.536	9	Medium	10.4609	1.09
FALSE	Master Protein	lcl	[protein=NP1450L] [protein_id=UYC33173.1] [location=complement(129101..133453)] [gbkey=CDS]	1	1	1	1450	163.6	8.5	0	1	1
	Checked	Sequence	Modifications	# Protein Groups	# Proteins	# PSMs	Master Protein Accessions	Master Protein Descriptions	# Missed Cleavages	Theo. MH+ [Da]	Sequence Length	Confidence (by Search Engine): Sequest HT	RT [min] (by Search Engine): Sequest HT	XCorr (by Search Engine): Sequest HT
	FALSE	VEAELLCSVR	1xCarbamidomethyl [C7]	1	1	1	lcl	[protein=NP1450L] [protein_id=UYC33173.1] [location=complement(129101..133453)] [gbkey=CDS]	0	1175.61	10	Medium	17.81	0.85
