# Supplementary material for: Chloroquine Phosphate Targets the MAPK-ERK Pathway to Inhibit ASFV SY- 1 Replication In Vitro
Source: Research Square preprint supplement (doi:10.21203/rs.3.rs-8029940/v1), 2025-11-24
Supplement: Supplementary file 2 [file 2c0722951f1858d519452e85.xlsx]

## Sheet: Sheet1
Supplementary Table 2: EDGs of 24h
ENSEMBL	SYMBOL	baseMean	log2FoldChange	lfcSE	stat	pvalue	padj	24h-control-1	24h-control-2	24h-control-3	24h-CQP-1	24h-CQP-2	24h-CQP-3
ENSSSCG00000045003	gene_sourceensembl	9.07702	-2.79326	0.805281	-3.46868	0.0129791	1	1.05359	0.90574	4.89454	13.1369	10.6076	23.8637
ENSSSCG00000061477	gene_sourceensembl	92.8925	-2.62633	0.251675	-10.4354	5.17e-11	3.76e-08	36.8757	20.832	20.5571	175.833	134.042	169.215
ENSSSCG00000017624	CUEDC1	17.1124	-2.47187	0.552324	-4.4754	0.00385091	0.763764	7.37514	4.5287	3.91563	38.4003	28.9299	19.5249
ENSSSCG00000040719	KIAA0040	22.7923	-2.20147	0.447471	-4.9198	0.00362627	0.730276	8.42873	8.15166	7.83126	34.3581	35.6802	42.3039
ENSSSCG00000017296	ACE	10.4947	-2.13947	0.665377	-3.21542	0.043402	1	2.10718	4.5287	4.89454	15.158	13.5006	22.779
ENSSSCG00000038508	SPTBN2	94.2112	-2.06774	0.222083	-9.31067	7.63e-07	0.000344328	34.7685	44.3812	29.3672	148.548	155.257	152.945
ENSSSCG00000035958	EVA1A	19.5187	-1.97079	0.546048	-3.60918	0.0377151	1	2.10718	15.3976	5.87345	20.2107	27.9656	45.558
ENSSSCG00000008124	NEURL3	73.4467	-1.90648	0.270658	-7.0439	0.00040524	0.112078	35.8221	31.7009	25.4516	154.612	104.148	88.9466
ENSSSCG00000027124	gene_sourceensembl	26.7894	-1.90432	0.406536	-4.68426	0.0130588	1	9.48233	15.3976	8.81017	47.4951	40.5018	39.0497
ENSSSCG00000060594	gene_sourceensembl	21.9963	-1.80534	0.441917	-4.08524	0.0341995	1	9.48233	7.24592	12.7258	38.4003	33.7515	30.372
ENSSSCG00000063105	gene_sourceensembl	58.0653	-1.74885	0.315271	-5.54712	0.00876863	1	9.48233	31.7009	38.1774	86.9059	96.433	85.6924
ENSSSCG00000011812	TPRG1	22.9284	-1.7175	0.435966	-3.93953	0.0499056	1	9.48233	11.7746	10.768	46.4845	30.8586	28.2026
ENSSSCG00000001616	gene_sourceensembl	149.098	-1.60884	0.178351	-9.02064	0.000320422	0.0911809	73.7514	62.496	85.165	226.359	252.654	194.164
ENSSSCG00000006238	CYP7A1	6874.8	-1.58107	0.0373552	-42.3253	7.33e-55	4.8e-51	3278.78	3460.83	3590.63	10203.4	10310.6	10404.6
ENSSSCG00000010533	PYROXD2	44.0342	-1.56326	0.314258	-4.97444	0.0365393	1	29.5006	19.0205	18.5992	55.5793	74.2534	67.2523
ENSSSCG00000010507	TLL2	634.844	-1.50202	0.084904	-17.6908	1.68e-09	1.05e-06	315.024	320.632	358.28	960.007	945.043	910.075
ENSSSCG00000036822	TMEM273	76.6944	-1.44844	0.252779	-5.73006	0.0380289	1	32.6613	43.4755	46.9876	145.517	90.647	100.878
ENSSSCG00000046151	gene_sourceensembl	111.472	-1.42597	0.192616	-7.40322	0.0134997	1	65.3227	66.119	49.9243	158.654	163.936	164.877
ENSSSCG00000015617	G0S2	196.118	-1.39909	0.152676	-9.16378	0.00447506	0.86145	116.949	101.443	105.722	256.675	326.908	269.009
ENSSSCG00000039426	FSTL1	185.912	-1.36976	0.154629	-8.85836	0.00839524	1	119.056	96.0084	96.9119	290.023	274.834	238.637
ENSSSCG00000008785	FAM114A1	328.868	-1.26954	0.117331	-10.8202	0.0108013	1	180.164	207.414	189.908	446.656	434.913	514.155
ENSSSCG00000005688	PTGES	791.99	-1.26578	0.0840561	-15.0588	0.000783464	0.189918	489.92	451.964	454.213	1002.45	1133.09	1220.3
ENSSSCG00000009979	NEFH	834.102	-1.22387	0.0740155	-16.5353	0.00124462	0.290929	520.474	508.12	471.833	1209.61	1126.34	1168.24
ENSSSCG00000001931	gene_sourceensembl	982.985	-1.17963	0.0825374	-14.2921	0.0147636	1	666.924	524.423	616.712	1291.46	1322.1	1476.3
ENSSSCG00000009668	CLU	2670.97	-1.09182	0.0471086	-23.1767	0.0256399	1	1751.07	1665.66	1703.3	3572.24	3789.82	3543.76
ENSSSCG00000006153	FABP5	46452.3	1.06415	0.0319826	33.2726	0.0224477	1	60507.8	64142.7	63886.4	30029	29131.4	31016.3
ENSSSCG00000037735	gene_sourceensembl	2287.61	1.10028	0.0516405	21.3065	0.0260786	1	3180.79	3010.68	3167.74	1511.76	1366.46	1488.23
ENSSSCG00000017488	CSF3	1124.46	1.10921	0.0632643	17.5329	0.0421577	1	1585.66	1516.21	1508.5	696.258	724.212	715.911
ENSSSCG00000017738	ADAP2	877.364	1.11927	0.0707283	15.8249	0.0458676	1	1207.42	1182.9	1213.85	535.583	541.953	582.492
ENSSSCG00000039798	SLC11A1	12318.8	1.13007	0.0308409	36.6421	1.23e-05	0.00489683	16514	16971.7	17245.4	7596.18	7740.67	7844.65
ENSSSCG00000015662	gene_sourceensembl	740.604	1.13067	0.0773835	14.6112	0.045651	1	1021.98	1057	971.076	481.014	449.378	463.173
ENSSSCG00000059119	gene_sourceensembl	974.345	1.13741	0.0748244	15.2011	0.0331439	1	1400.22	1386.69	1232.44	653.815	588.241	584.661
ENSSSCG00000011264	CSRNP1	1175.96	1.16342	0.0667037	17.4416	0.00714509	1	1570.91	1563.31	1744.41	727.584	744.463	705.064
ENSSSCG00000039419	SLCO4A1	564.627	1.17496	0.0953749	12.3194	0.0332923	1	733.3	734.555	880.038	358.739	339.444	341.685
ENSSSCG00000001849	ANPEP	2258.98	1.1873	0.0468288	25.3541	3.17e-05	0.0115296	3172.36	3128.42	3117.82	1380.39	1383.81	1371.08
ENSSSCG00000023522	TGM2	4616.89	1.19584	0.0475416	25.1536	1.9e-05	0.00710479	6139.28	6289.46	6855.29	2677.91	2935.42	2803.99
ENSSSCG00000035598	EDN1	2421.2	1.19876	0.0548654	21.8491	0.000145751	0.0443693	3187.12	3291.46	3640.56	1504.68	1471.57	1431.82
ENSSSCG00000010128	SEPTIN5	930.769	1.20091	0.0745653	16.1055	0.0035254	0.721054	1335.95	1286.15	1271.6	564.888	616.207	509.816
ENSSSCG00000057498	gene_sourceensembl	271.367	1.21218	0.12484	9.70993	0.0445982	1	348.739	408.489	379.816	170.78	162.007	158.368
ENSSSCG00000061874	gene_sourceensembl	468.862	1.23777	0.0991395	12.4852	0.00823378	1	650.066	683.833	642.163	308.213	281.584	247.315
ENSSSCG00000013236	MYBPC3	1374.74	1.23856	0.063301	19.5663	8.2e-05	0.026849	1818.5	1935.57	2038.09	783.163	821.609	851.501
ENSSSCG00000005457	gene_sourceensembl	394.637	1.24971	0.108475	11.5207	0.0106683	1	553.136	561.559	553.083	257.686	244.94	197.418
ENSSSCG00000035256	SPN	3495.41	1.26253	0.0464814	27.162	8.12e-09	4.83e-06	4969.79	4838.46	4996.34	1941.23	2193.85	2032.75
ENSSSCG00000005949	SLA	959.886	1.2733	0.07399	17.209	0.000110518	0.0352849	1321.2	1372.2	1381.24	618.446	556.418	509.816
ENSSSCG00000060860	TNF	3206.43	1.28	0.0532664	24.0302	7.34e-08	3.66e-05	4540.98	4184.52	4902.37	1869.49	1867.91	1873.3
ENSSSCG00000056213	gene_sourceensembl	1862.22	1.28197	0.0578085	22.1762	5.37e-07	0.000250892	2762.52	2457.27	2697.87	1084.3	1053.05	1118.34
ENSSSCG00000017700	CCL3L1	24459.6	1.28362	0.0339329	37.828	3.19e-17	3.79e-14	33760.2	33732.5	36534.8	14446.6	14211.3	14072
ENSSSCG00000003069	KCNN4	516.221	1.29476	0.0924331	14.0075	0.00071406	0.179751	714.335	744.518	741.033	272.844	305.693	318.906
ENSSSCG00000006335	RGS4	1609.87	1.31456	0.0566587	23.2014	1.41e-08	7.71e-06	2395.87	2263.44	2229.95	931.712	897.791	940.447
ENSSSCG00000040631	LPL	54380.4	1.32344	0.0293497	45.092	1.53e-28	4e-25	75315	78689.7	79121.2	31813.6	30341.7	31001.1
ENSSSCG00000015413	FGL2	531.667	1.34412	0.089044	15.095	5.56e-05	0.0186729	776.497	739.083	773.337	297.097	305.693	298.296
ENSSSCG00000015579	PTGS2	6191.27	1.34964	0.0440407	30.6454	1.02e-15	1.03e-12	8504.59	8628.07	9545.33	3512.61	3426.26	3530.74
ENSSSCG00000005224	GLIS3	199.752	1.36468	0.145488	9.38	0.00609502	1	305.542	296.177	261.368	110.148	107.041	118.234
ENSSSCG00000002268	AKAP5	316.85	1.38783	0.117169	11.8447	0.000466458	0.124611	431.973	457.398	485.538	164.717	171.651	189.825
ENSSSCG00000005122	TEK	83.7872	1.39943	0.226475	6.17919	0.0388924	1	136.967	124.992	102.785	41.4319	52.0738	44.4733
ENSSSCG00000002829	MMP2	241.282	1.40161	0.140326	9.98826	0.002105	0.467025	362.436	346.898	341.639	114.19	161.043	121.488
ENSSSCG00000008429	EPCAM	5035.45	1.40796	0.0430108	32.7352	1.21e-21	2.26e-18	7172.85	7077.45	7691.28	2767.85	2654.8	2848.46
ENSSSCG00000037449	CSF1	4915.23	1.40883	0.0519121	27.1387	1.7e-15	1.48e-12	6948.44	6687.08	7787.21	2562.71	2720.37	2785.55
ENSSSCG00000035077	INHBA	577.279	1.41817	0.0876098	16.1874	9.07e-07	0.000395698	864.999	797.051	858.502	312.255	307.621	323.245
ENSSSCG00000014362	HBEGF	422.323	1.42449	0.106961	13.3178	3.61e-05	0.0127876	587.904	583.296	674.467	211.201	227.582	249.484
ENSSSCG00000004890	SERPINB2	182.431	1.43134	0.170838	8.37831	0.00578777	1	249.701	259.947	288.778	68.7163	115.72	111.726
ENSSSCG00000039594	SSBP3	625.648	1.44581	0.0848895	17.0316	7.54e-08	3.66e-05	961.929	881.285	903.532	341.56	342.337	323.245
ENSSSCG00000027677	gene_sourceensembl	84.0782	1.45569	0.224674	6.47909	0.0212697	1	120.109	112.312	137.047	47.4951	37.6089	49.8969
ENSSSCG00000033327	PDGFB	294.145	1.46063	0.125199	11.6664	0.000117009	0.0364678	396.151	432.944	464.981	139.454	161.043	170.3
ENSSSCG00000011859	HEG1	215.017	1.46606	0.146888	9.98081	0.000754583	0.186368	289.738	308.857	348.491	97.0112	123.434	122.573
ENSSSCG00000007448	OCSTAMP	3822.81	1.4766	0.0467076	31.6137	9.52e-25	2.08e-21	5364.89	5544.03	5965.46	2017.02	2072.34	1973.1
ENSSSCG00000017237	CD300LB	124.066	1.50008	0.199937	7.50276	0.00618873	1	175.95	214.66	159.562	53.5583	81.0037	59.6593
ENSSSCG00000028376	TM4SF19	9891.56	1.53327	0.0424421	36.1261	1.65e-36	7.21e-33	13873.7	14600.5	15635.1	5286.1	4982.69	4971.25
ENSSSCG00000025560	PGLYRP2	97.959	1.56472	0.215345	7.26613	0.00436551	0.852904	154.878	132.238	151.731	48.5056	38.5732	61.8287
ENSSSCG00000023737	CSF2	311.798	1.57393	0.131145	12.0014	6.04e-06	0.0025486	486.759	461.927	452.255	195.033	144.649	130.166
ENSSSCG00000022105	SUCNR1	79.2283	1.59063	0.236445	6.72727	0.00624559	1	140.128	104.16	112.574	37.3897	36.6445	44.4733
ENSSSCG00000026695	TNFSF14	1280.64	1.60943	0.0701554	22.941	1.86e-18	2.71e-15	1744.75	1994.44	2046.9	631.583	622.957	643.236
ENSSSCG00000042862	gene_sourceensembl	982.591	1.60954	0.0740231	21.7438	9.02e-17	9.84e-14	1483.46	1536.13	1419.42	511.33	439.734	505.477
ENSSSCG00000009630	EGR3	42.1961	1.62441	0.327939	4.9534	0.0284516	1	48.4652	64.3075	78.3126	16.1685	23.1439	22.779
ENSSSCG00000056251	CCL22	4257.73	1.63039	0.0567467	28.7311	5.68e-29	1.86e-25	5902.22	6285.83	7121.55	2156.48	2071.38	2008.89
ENSSSCG00000036865	SDS	833.641	1.63659	0.0744499	21.9824	6.12e-18	8.02e-15	1270.63	1241.77	1271.6	397.14	394.411	426.293
ENSSSCG00000015907	GALNT3	29.744	1.67185	0.403464	4.14374	0.0479363	1	26.3398	51.6272	57.7555	12.1264	15.4293	15.186
ENSSSCG00000002383	FOS	631.994	1.68504	0.0864016	19.5025	1.11e-15	1.04e-12	1007.23	964.613	920.173	301.139	286.406	312.398
ENSSSCG00000009215	ABCG2A	32.466	1.70699	0.372063	4.58789	0.028705	1	45.3044	47.0985	56.7766	9.0948	20.2509	16.2707
ENSSSCG00000014987	MMP12	100.259	1.715	0.220552	7.77597	0.000593698	0.152382	141.181	153.07	167.393	41.4319	62.6814	35.7956
ENSSSCG00000034853	gene_sourceensembl	422.31	1.74778	0.44413	3.93528	0.0461208	1	813.373	679.305	460.087	139.454	302.8	138.843
ENSSSCG00000008765	PCDH7	36.5163	1.76723	0.343042	5.15165	0.0126577	1	62.1619	52.5329	54.8188	14.1475	20.2509	15.186
ENSSSCG00000037019	CAMK4	212.696	1.77242	0.146866	12.0682	7.23e-08	3.66e-05	326.613	343.275	317.166	80.8427	104.148	104.133
ENSSSCG00000029592	GPRC5A	70.4085	1.79756	0.258039	6.96622	0.00099797	0.237517	104.306	125.898	97.8908	23.2423	38.5732	32.5414
ENSSSCG00000001660	PTK7	18.6937	1.8574	0.491372	3.78002	0.040501	1	24.2326	35.3238	28.3883	5.05267	11.572	7.593
ENSSSCG00000001036	TFAP2A	50.757	1.87463	0.306854	6.10921	0.00218372	0.468604	77.9658	89.6682	71.4603	13.1369	24.1082	28.2026
ENSSSCG00000032328	MAP6D1	21.0839	1.92463	0.498938	3.85745	0.0319277	1	27.3934	45.287	27.4094	16.1685	4.82165	5.42357
ENSSSCG00000054191	gene_sourceensembl	37.9995	1.99013	0.34716	5.73259	0.00217171	0.468604	62.1619	67.0247	52.861	11.1159	16.3936	18.4401
ENSSSCG00000032015	SH3BGRL2	76.6456	1.99843	0.252953	7.90042	3.96e-05	0.013624	128.538	106.877	132.153	36.3792	21.2153	34.7109
ENSSSCG00000026043	TGM3	150.785	2.00376	0.178267	11.2402	8.98e-09	5.11e-06	224.415	256.324	242.769	53.5583	54.9668	72.6758
ENSSSCG00000008087	IL1B2	19.7106	2.01693	0.521427	3.86809	0.0255717	1	38.9829	22.6435	33.2829	15.158	3.85732	4.33886
ENSSSCG00000005385	NR4A3	202.105	2.07267	0.160981	12.8752	1.34e-11	1.03e-08	305.542	344.181	329.892	98.0217	65.5744	69.4217
ENSSSCG00000028331	IL1R2	199.713	2.13363	0.160395	13.3024	7.87e-13	6.44e-10	336.096	299.8	339.681	59.6215	75.2177	87.8618
ENSSSCG00000006452	CD1B	20.5739	2.14027	0.535083	3.99988	0.0165441	1	49.5188	24.455	26.4305	3.0316	4.82165	15.186
ENSSSCG00000012773	PNCK	16.9524	2.15995	0.561066	3.84972	0.0193483	1	36.8757	23.5492	22.5149	2.02107	4.82165	11.9319
ENSSSCG00000056408	gene_sourceensembl	13.2006	2.19975	0.617411	3.56285	0.0259968	1	25.2862	28.0779	11.7469	5.05267	5.78598	3.25414
ENSSSCG00000040681	FABP4	272.23	2.21961	0.134988	16.4431	8.2e-20	1.34e-16	434.08	482.759	427.783	93.9796	99.326	95.4548
ENSSSCG00000040110	gene_sourceensembl	9.86847	2.26778	0.713117	3.1801	0.0377199	1	14.7503	11.7746	22.5149	1.01053	4.82165	4.33886
ENSSSCG00000040342	gene_sourceensembl	27.3033	2.2995	0.442687	5.19441	0.00166515	0.375807	38.9829	48.0042	48.9454	14.1475	2.89299	10.8471
ENSSSCG00000022447	F3	2999.37	2.36784	0.0502046	47.1639	9.42e-164	1.23e-159	4813.86	5026.85	5235.2	950.912	1002.9	966.48
ENSSSCG00000031616	FOSB	101.557	2.40592	0.230102	10.4559	4.98e-10	3.26e-07	188.593	143.107	181.098	26.2739	36.6445	33.6261
ENSSSCG00000009616	HR	99.0681	2.51003	0.420089	5.97498	0.000162485	0.0483392	174.896	123.181	207.528	15.158	35.6802	37.965
ENSSSCG00000035420	HES4	27.5302	2.51679	0.45341	5.5508	0.00041098	0.112078	53.7332	40.7583	46.0087	2.02107	9.6433	13.0166
ENSSSCG00000015137	CRTAM	17.3122	2.54001	0.549432	4.62298	0.00253212	0.534605	37.9293	25.3607	25.4516	4.04213	6.75031	4.33886
ENSSSCG00000040961	LIF	16.2519	2.54177	0.557335	4.56058	0.00283461	0.588969	30.5542	27.1722	25.4516	5.05267	3.85732	5.42357
ENSSSCG00000040513	AQP3	27.2019	2.59802	0.457287	5.68137	0.000237422	0.0690635	42.1437	57.0616	41.1141	5.05267	13.5006	4.33886
ENSSSCG00000030262	gene_sourceensembl	70.4481	2.6007	0.971217	2.67777	0.0497669	1	123.27	221	18.5992	32.3371	14.4649	13.0166
ENSSSCG00000031321	NR4A1	82.2642	2.63505	0.262094	10.0538	2.21e-10	1.52e-07	145.396	153.07	126.279	16.1685	21.2153	31.4567
ENSSSCG00000057079	SHAS2	32.9763	2.694	0.407118	6.61725	1.58e-05	0.0061006	46.358	66.119	58.7345	8.08427	7.71464	10.8471
ENSSSCG00000034410	TBX10	6.40921	2.72462	0.943094	2.88902	0.0337627	1	6.32155	16.3033	10.768	0	2.89299	2.16943
ENSSSCG00000013352	E2F8	6.55567	2.7571	0.928037	2.9709	0.0291811	1	6.32155	18.1148	9.78908	1.01053	1.92866	2.16943
ENSSSCG00000058216	IGFBP3	21.2873	2.76731	0.54113	5.11396	0.000545449	0.142799	46.358	19.0205	46.0087	4.04213	5.78598	6.50829
ENSSSCG00000005608	ANGPTL2	5.86514	2.93575	0.983303	2.9856	0.0245296	1	10.5359	11.7746	8.81017	2.02107	0.96433	1.08471
ENSSSCG00000009873	DTX1	28.7734	2.99427	0.458692	6.52785	6.88e-06	0.00281326	49.5188	57.9673	46.0087	10.1053	5.78598	3.25414
ENSSSCG00000003777	SLC44A5	11.8154	3.16311	0.722417	4.37851	0.00137552	0.315887	23.179	18.1148	22.5149	2.02107	2.89299	2.16943
ENSSSCG00000037096	TMEM88	5.21496	3.20136	1.11023	2.8835	0.0237724	1	10.5359	11.7746	5.87345	2.02107	0	1.08471
ENSSSCG00000051874	gene_sourceensembl	25.0027	3.25303	1.0438	3.11652	0.0154683	1	103.252	9.0574	23.4938	5.05267	4.82165	4.33886
ENSSSCG00000041052	gene_sourceensembl	4.49147	3.64063	1.30109	2.79814	0.0213815	1	5.26796	9.96313	9.78908	0	1.92866	0
