# Supplementary material for: Chloroquine Phosphate Targets the MAPK-ERK Pathway to Inhibit ASFV SY- 1 Replication In Vitro
Source: Research Square preprint supplement (doi:10.21203/rs.3.rs-8029940/v1), 2025-11-24
Supplement: Supplementary file 3 [file 7784167c09ffe85c27cf686d.xlsx]

## Sheet: Sheet1
Supplementary Table 3: EDGs of 48h
ENSEMBL	SYMBOL	baseMean	log2FoldChange	lfcSE	stat	pvalue	padj	48h-control-1	48h-control-2	48h-control-3	48h-CQP-1	48h-CQP-2	48h-CQP-3
ENSSSCG00000021305	gene_sourceensembl	56.4573	-3.36095	1.08199	-3.10628	0.0145807	1	4.48521	13.521	12.0759	230.797	61.7609	16.1033
ENSSSCG00000061477	gene_sourceensembl	318.571	-2.05516	0.14778	-13.9069	4.66e-13	4.18e-10	128.277	101.927	139.735	495.028	457.268	589.19
ENSSSCG00000046533	gene_sourceensembl	37.4975	-2.02	0.363388	-5.55881	0.00250086	0.61071	11.6615	15.6011	17.2512	66.8665	55.8223	57.7823
ENSSSCG00000017296	ACE	101.433	-1.63691	0.235566	-6.94885	0.00342812	0.781388	52.9254	41.603	53.4788	168.245	115.208	177.136
ENSSSCG00000001616	gene_sourceensembl	69.2986	-1.52492	0.282143	-5.40475	0.0314104	1	42.1609	39.5229	25.8768	129.419	83.1396	95.6723
ENSSSCG00000006238	CYP7A1	33345.3	-1.5082	0.0497017	-30.3449	7.67e-25	2.06e-21	17249.2	18122.3	16670.7	49897.5	51067.9	47064.1
ENSSSCG00000009668	CLU	4878.33	-1.4828	0.0514353	-28.8284	3.1e-21	5.21e-18	2548.49	2535.71	2627.36	7412.48	7147.63	6998.29
ENSSSCG00000016244	COL4A4	75.5376	-1.44268	0.25721	-5.60898	0.0426164	1	48.4402	43.6832	30.1896	111.085	98.5799	121.248
ENSSSCG00000032674	TCEA3	100.747	-1.42342	0.254893	-5.58439	0.0483394	1	78.9396	48.8836	36.2276	169.323	141.337	129.773
ENSSSCG00000010507	TLL2	1312.14	-1.4083	0.0723568	-19.4633	8.36e-09	4.49e-06	697.001	721.813	734.902	1952.07	1950.22	1816.83
ENSSSCG00000009231	CDS1	508.707	-1.18956	0.111014	-10.7154	0.0438618	1	304.994	276.66	346.75	676.215	768.448	679.178
ENSSSCG00000028376	TM4SF19	4828.47	1.11305	0.0515164	21.6057	0.0141033	1	6381.55	6769.85	6659.84	3111.45	3054.79	2993.31
ENSSSCG00000016878	FGF10	1636.35	1.11797	0.0697753	16.0225	0.045441	1	2203.13	2223.68	2292.69	967.408	1108.13	1023.03
ENSSSCG00000056379	CD24	21015.7	1.11888	0.0512227	21.8434	0.0101487	1	27798.4	28172.5	30369.9	12831.9	13064.8	13856.4
ENSSSCG00000014184	PAM	1747.29	1.1295	0.0682548	16.5483	0.028897	1	2288.35	2482.66	2426.38	1122.71	1034.49	1129.12
ENSSSCG00000006153	FABP5	17699.3	1.19844	0.0517488	23.1589	6.28e-05	0.0248266	23706.1	25631.6	24624.4	10861.5	11215.5	10156.4
ENSSSCG00000060276	gene_sourceensembl	26440.3	1.20168	0.0547644	21.9428	0.000115361	0.040774	37539.4	35366.7	37667.2	15339.4	15423.6	17305.3
ENSSSCG00000017705	CCL5	12671	1.20494	0.0582723	20.6777	0.000218299	0.0666356	19109.7	17144.6	16772.5	7422.18	7501.57	8075.31
ENSSSCG00000004891	SERPINB7	800.835	1.21818	0.0930523	13.0913	0.00952143	1	1055.82	1070.24	1234.33	457.281	488.148	499.201
ENSSSCG00000015375	ITGB8	5067.27	1.23835	0.0696636	17.7761	0.000311524	0.0871683	7013.96	6751.13	7591.4	3103.9	2686.6	3256.65
ENSSSCG00000008959	CXCL2	12900.8	1.25468	0.0676847	18.5371	8.4e-05	0.0305101	18171.4	16768.1	19608.6	7134.23	7323.41	8399.27
ENSSSCG00000031109	HILPDA	1530.07	1.273	0.0794489	16.0229	0.00029498	0.0842953	2202.24	1954.3	2334.95	853.087	940.666	895.152
ENSSSCG00000037019	CAMK4	308.638	1.29286	0.132864	9.73072	0.0137538	1	392.007	463.874	458.883	189.815	180.532	166.716
ENSSSCG00000008953	CXCL8	252171	1.29774	0.0670936	19.3422	4.55e-06	0.00210621	348354	335562	391624	140288	135900	161298
ENSSSCG00000032343	CCL4	1071.04	1.31067	0.0845458	15.5025	0.000119124	0.0410244	1635.31	1426.98	1515.52	583.464	666.305	598.662
ENSSSCG00000027607	IER3	5264.73	1.32971	0.0568767	23.3788	3.38e-09	1.97e-06	8031.21	7362.7	7204.11	2908.69	3028.66	3052.99
ENSSSCG00000015299	STEAP4	304.221	1.33732	0.136073	9.82793	0.00658864	1	383.934	471.154	452.845	158.538	181.719	177.136
ENSSSCG00000023522	TGM2	2030.2	1.34321	0.0668974	20.0786	1.45e-07	6.94e-05	3029.31	2951.74	2756.75	1206.83	1114.07	1122.49
ENSSSCG00000040631	LPL	28288.2	1.40081	0.0536683	26.1013	4.06e-14	4.54e-11	38618.5	42800.2	41685	15859.2	16103	14663.4
ENSSSCG00000009216	SPP1	149923	1.40432	0.0451052	31.1343	1.57e-19	2.34e-16	208221	216963	227698	82543.5	81611.1	82501.7
ENSSSCG00000036560	PAWR	188.98	1.41241	0.165763	8.5207	0.00642354	1	245.789	273.54	304.484	97.0643	111.645	101.356
ENSSSCG00000021220	CKB	1357.28	1.41407	0.102683	13.7713	2.76e-05	0.0112288	2089.21	2229.92	1604.36	775.436	688.871	755.906
ENSSSCG00000016254	gene_sourceensembl	244.584	1.45299	0.166724	8.7149	0.00329409	0.781388	319.347	335.945	420.067	103.535	134.211	154.402
ENSSSCG00000034853	gene_sourceensembl	1830.04	1.50478	0.247929	6.0694	0.0208759	1	2278.48	2827.97	3013.79	931.817	713.813	1214.37
ENSSSCG00000005224	GLIS3	400.493	1.5203	0.128465	11.8344	2.56e-05	0.0107419	536.431	554.361	690.912	203.835	204.286	213.131
ENSSSCG00000017488	CSF3	1009.19	1.54139	0.207984	7.41109	0.00462028	1	1712.45	1384.34	1411.15	476.694	426.388	644.13
ENSSSCG00000023737	CSF2	110.963	1.54868	0.234478	6.60481	0.0096413	1	182.099	157.051	156.124	38.8257	79.5765	52.0988
ENSSSCG00000004890	SERPINB2	238.685	1.55695	0.154513	10.0765	0.000156339	0.049995	337.287	379.628	353.65	117.556	100.955	143.035
ENSSSCG00000037087	PRRT4	56.4325	1.57439	0.310565	5.06943	0.0321932	1	87.013	83.2061	83.6684	16.1774	29.6927	38.8373
ENSSSCG00000055050	gene_sourceensembl	62.5623	1.59306	0.293311	5.4313	0.0215906	1	75.3515	98.8072	107.82	40.9827	24.9419	27.4703
ENSSSCG00000009490	DCT	187.361	1.59569	0.164152	9.72082	0.000142325	0.0466234	273.598	266.259	304.484	98.1428	92.6413	89.0415
ENSSSCG00000040513	AQP3	675.486	1.61505	0.0936161	17.2518	2.52e-11	1.88e-08	989.436	1061.92	1004.88	315.998	334.934	345.746
ENSSSCG00000022447	F3	693.846	1.61568	0.0952743	16.9582	5.16e-11	3.65e-08	1017.24	1105.6	1017.82	354.824	312.367	355.219
ENSSSCG00000017700	CCL3L1	4939.45	1.63622	0.0651545	25.1129	7.97e-23	1.53e-19	8032.11	7337.74	7054.89	2226.01	2435.99	2550
ENSSSCG00000032015	SH3BGRL2	67.1817	1.65869	0.274751	6.03706	0.00825591	1	87.013	109.208	110.408	29.1193	28.505	38.8373
ENSSSCG00000023607	CYP4F22	34.9041	1.65947	0.380138	4.36545	0.0413857	1	55.6166	59.2843	43.9906	11.8634	22.5665	16.1033
ENSSSCG00000012026	ADAMTS1	107.585	1.67661	0.214274	7.82462	0.00079511	0.201493	161.467	173.693	156.124	49.6107	58.1977	46.4153
ENSSSCG00000023186	CA4	157.644	1.68111	0.187408	8.97028	0.000139343	0.0466234	214.393	260.019	245.83	83.0439	81.9519	60.624
ENSSSCG00000002829	MMP2	648.98	1.68286	0.126284	13.326	3.2e-08	1.65e-05	1132.96	1003.67	834.959	313.841	254.17	354.272
ENSSSCG00000033381	IRF4	50.9413	1.68644	0.319546	5.27759	0.0158506	1	76.2485	89.4465	68.1423	19.4129	20.1911	32.2065
ENSSSCG00000022849	IL2RA	55.9156	1.70054	0.299696	5.67421	0.00970681	1	76.2485	79.0458	100.92	28.0408	28.505	22.734
ENSSSCG00000054796	LRRC31	38.5447	1.70227	0.369176	4.61101	0.0285678	1	48.4402	54.084	74.1803	23.7268	16.6279	14.2088
ENSSSCG00000002478	SERPINA12	28.506	1.71754	0.423531	4.0553	0.0451139	1	52.0284	36.4027	42.2655	11.8634	19.0033	9.4725
ENSSSCG00000008957	AMCF0II	71217.7	1.71841	0.0646022	26.5999	4.98e-29	1.67e-25	105939	105837	115948	32073.3	30526.5	36982.5
ENSSSCG00000028741	DNMT3L	112.926	1.72271	0.214204	8.04236	0.000370524	0.0995301	175.82	192.414	151.811	47.4537	57.01	53.046
ENSSSCG00000023627	LYPD6	43.2955	1.73662	0.346412	5.01317	0.0167334	1	56.5136	73.8454	69.8675	14.0204	19.0033	26.523
ENSSSCG00000026043	TGM3	119.367	1.73863	0.214758	8.09578	0.000291536	0.0842953	176.717	198.655	176.825	60.3956	39.1944	64.413
ENSSSCG00000056251	CCL22	10169.3	1.75491	0.0569655	30.8066	2.19e-40	2.94e-36	14680.1	15415	16973.5	4670.95	4664.13	4612.16
ENSSSCG00000007448	OCSTAMP	1465.28	1.79663	0.0790093	22.7394	3.29e-24	7.37e-21	2391.51	2326.65	2106.37	649.252	703.124	614.765
ENSSSCG00000054191	gene_sourceensembl	110.945	1.81025	0.235252	7.69494	0.000286402	0.0842953	169.541	185.134	163.887	30.1978	53.4469	63.4658
ENSSSCG00000023525	TMEM26	272.605	1.83279	0.145218	12.621	4.88e-09	2.73e-06	411.742	412.91	451.982	139.126	112.832	107.039
ENSSSCG00000009873	DTX1	121.029	1.86208	0.227589	8.18178	7.6e-05	0.0283411	207.217	185.134	178.55	43.1397	39.1944	72.9383
ENSSSCG00000060005	gene_sourceensembl	31.5771	1.89059	0.394776	4.78903	0.0120369	1	52.9254	43.6832	52.6162	15.0989	11.8771	13.2615
ENSSSCG00000038929	CEMIP	827.683	1.90021	0.112751	16.8531	7.08e-16	9.51e-13	1378.75	1163.85	1376.65	308.449	315.931	422.474
ENSSSCG00000015589	VASH2	26.4677	1.90729	0.466666	4.08705	0.0259362	1	26.9112	54.084	44.8532	11.8634	5.93855	15.156
ENSSSCG00000008429	EPCAM	5786.02	1.93137	0.0724706	26.6504	4.21e-38	2.82e-34	8077.86	9251.48	10174.8	2314.44	2485.88	2411.7
ENSSSCG00000014012	GFPT2	30.0762	1.93626	0.430575	4.49693	0.0148357	1	52.0284	52.0038	39.6778	11.8634	5.93855	18.945
ENSSSCG00000052556	gene_sourceensembl	23.7724	1.93683	0.469105	4.12878	0.022909	1	31.3964	34.3225	47.4409	6.47095	10.6894	12.3143
ENSSSCG00000011936	ZBED2	252.89	1.94182	0.153675	12.6359	4.43e-10	2.98e-07	435.065	360.906	408.854	98.1428	95.0167	119.354
ENSSSCG00000025176	NOTCH3	15.6438	1.97137	0.57249	3.44351	0.044872	1	25.1172	17.6813	31.9148	5.39246	7.12625	6.63075
ENSSSCG00000033657	GREM1	70.0916	1.97562	0.307242	6.43016	0.000748162	0.193242	131.865	125.849	77.6305	39.9042	22.5665	22.734
ENSSSCG00000024802	MACC1	150.917	1.97989	0.188335	10.5125	9.81e-08	4.88e-05	243.098	221.536	257.906	56.0816	60.5732	66.3075
ENSSSCG00000015383	gene_sourceensembl	15.8884	1.98821	0.586977	3.3872	0.0461338	1	26.0142	14.5611	35.365	5.39246	8.31396	5.6835
ENSSSCG00000039214	gene_sourceensembl	18779.3	2.05217	0.158757	12.9264	1.71e-11	1.35e-08	30370.2	27176.1	33240.5	6767.54	6468.26	8653.13
ENSSSCG00000012066	KCNJ15	163.979	2.09888	0.182347	11.5103	8.39e-10	5.36e-07	278.083	268.34	251.868	58.2386	58.1977	69.1493
ENSSSCG00000033667	gene_sourceensembl	15.0265	2.12472	0.588537	3.61017	0.0279997	1	19.7349	27.042	26.7394	4.31397	4.75084	7.578
ENSSSCG00000036865	SDS	1800.3	2.13648	0.0923208	23.1419	4e-35	1.79e-31	3229.35	2725	2849.9	651.409	576.039	770.115
ENSSSCG00000000807	SLC38A1	81.1649	2.1375	0.264171	8.09133	8.32e-06	0.00372269	130.071	138.33	129.384	28.0408	21.3788	39.7845
ENSSSCG00000001682	DLK2	55.8345	2.13893	0.31676	6.75252	0.000161848	0.0505532	104.057	88.4065	81.0808	16.1774	17.8156	27.4703
ENSSSCG00000049017	gene_sourceensembl	256.415	2.19605	0.168903	13.0018	7.14e-13	6e-10	421.609	381.708	461.47	87.3579	68.8871	117.459
ENSSSCG00000011689	PLOD2	27.2916	2.23632	0.456454	4.89934	0.00337901	0.781388	38.5728	39.5229	56.929	14.0204	7.12625	7.578
ENSSSCG00000033385	gene_sourceensembl	27.8116	2.28818	0.456938	5.00763	0.00240752	0.598803	34.0876	58.2443	46.5783	9.70643	5.93855	12.3143
ENSSSCG00000040681	FABP4	122.37	2.30062	0.22039	10.4389	1.8e-09	1.1e-06	179.408	234.017	197.527	40.9827	36.819	45.468
ENSSSCG00000031858	KCNJ10	37.4517	2.33756	0.394785	5.9211	0.000351922	0.0964624	53.8225	61.3645	72.4551	18.3344	8.31396	10.4198
ENSSSCG00000028331	IL1R2	172.8	2.38313	0.191906	12.4182	2.85e-13	2.74e-10	259.245	298.502	311.385	64.7095	59.3855	43.5735
ENSSSCG00000006174	JPH1	31.5275	2.42377	0.422847	5.73203	0.000379801	0.100022	59.2047	57.2042	43.1281	9.70643	9.50167	10.4198
ENSSSCG00000040961	LIF	56.6414	2.48015	0.3578	6.93167	1.76e-05	0.00762877	80.7337	68.645	138.872	12.9419	17.8156	20.8395
ENSSSCG00000038351	TNFRSF18	9.5128	2.48736	0.773491	3.21576	0.0272484	1	19.7349	15.6011	12.9384	2.15698	4.75084	1.8945
ENSSSCG00000005608	ANGPTL2	18.0462	2.54596	0.571874	4.45196	0.0034325	0.781388	37.6757	22.8817	31.9148	3.23548	5.93855	6.63075
ENSSSCG00000063046	gene_sourceensembl	9.01522	2.61526	0.820471	3.18751	0.0244993	1	14.3527	20.8015	11.2133	1.07849	4.75084	1.8945
ENSSSCG00000039020	gene_sourceensembl	6.87938	2.74926	0.941959	2.91866	0.0316871	NA	8.07337	16.6412	11.2133	1.07849	2.37542	1.8945
ENSSSCG00000017044	IL12B	137.19	2.78336	0.223861	12.4334	8.17e-16	9.98e-13	236.819	209.055	273.432	31.2763	30.8804	41.679
ENSSSCG00000008088	gene_sourceensembl	8.80029	2.886	0.873267	3.30483	0.0154022	1	21.529	10.4008	14.6635	4.31397	0	1.8945
ENSSSCG00000039760	PRR16	6.24144	2.91751	1.03479	2.81941	0.032015	NA	6.27929	14.5611	12.0759	2.15698	2.37542	0
ENSSSCG00000002306	GALNT16	87.0994	3.08386	0.282301	10.924	7.81e-14	8.07e-11	170.438	138.33	158.711	20.4914	16.6279	17.9978
ENSSSCG00000011583	TMEM40	4.25784	5.43538	1.51823	3.58007	0.00175351	NA	12.5586	10.4008	2.58768	0	0	0
ENSSSCG00000008087	IL1B2	11.7695	5.92435	1.29528	4.57378	7.19e-05	0.0275849	26.9112	16.6412	25.8768	0	1.18771	0
