# Supplementary material for: Chloroquine Phosphate Targets the MAPK-ERK Pathway to Inhibit ASFV SY- 1 Replication In Vitro
Source: Research Square preprint supplement (doi:10.21203/rs.3.rs-8029940/v1), 2025-11-24
Supplement: Supplementary file 4 [file 92dc670441381907612ebcd1.xlsx]

## Sheet: Sheet1
Supplementary Table 3: Identification of viral protein in control group
Checked	Master	Accession	Description	Coverage [%]	# PSMs	# Unique Peptides	# AAs	MW [kDa]	calc. pI	Score Sequest HT: Sequest HT	# Peptides (by Search Engine): Sequest HT	# Protein Groups
FALSE	Master Protein	lcl	[protein=MGF_505-5R] [protein_id=UYC33101.1] [location=37359..38855] [gbkey=CDS]	4	2	2	498	58.6	7.28	1.26	2	1
	Checked	Sequence	Modifications	# Protein Groups	# Proteins	# PSMs	Master Protein Accessions	Master Protein Descriptions	# Missed Cleavages	Theo. MH+ [Da]	Sequence Length	Confidence (by Search Engine): Sequest HT	RT [min] (by Search Engine): Sequest HT	XCorr (by Search Engine): Sequest HT
	FALSE	LGLYWEKHGSLQR		1	1	1	lcl	[protein=MGF_505-5R] [protein_id=UYC33101.1] [location=37359..38855] [gbkey=CDS]	1	1586.84	13	Medium	42.7562	0.83
	FALSE	EDLIIK		1	1	1	lcl	[protein=MGF_505-5R] [protein_id=UYC33101.1] [location=37359..38855] [gbkey=CDS]	0	730.435	6	High	30.1386	1.26
FALSE	Master Protein	lcl	[protein=MGF_360-14L] [protein_id=UYC33096.1] [location=complement(31854..32927)] [gbkey=CDS]	3	1	1	357	41.3	7.42	0	1	1
	Checked	Sequence	Modifications	# Protein Groups	# Proteins	# PSMs	Master Protein Accessions	Master Protein Descriptions	# Missed Cleavages	Theo. MH+ [Da]	Sequence Length	Confidence (by Search Engine): Sequest HT	RT [min] (by Search Engine): Sequest HT	XCorr (by Search Engine): Sequest HT
	FALSE	AIHYFYKRHK		1	1	1	lcl	[protein=MGF_360-14L] [protein_id=UYC33096.1] [location=complement(31854..32927)] [gbkey=CDS]	2	1362.74	10	Medium	22.9209	1.01
FALSE	Master Protein	lcl	[protein=F317L] [protein_id=UYC33117.1] [location=complement(55017..55970)] [gbkey=CDS]	3	1	1	317	36.6	6.95	0	1	1
	Checked	Sequence	Modifications	# Protein Groups	# Proteins	# PSMs	Master Protein Accessions	Master Protein Descriptions	# Missed Cleavages	Theo. MH+ [Da]	Sequence Length	Confidence (by Search Engine): Sequest HT	RT [min] (by Search Engine): Sequest HT	XCorr (by Search Engine): Sequest HT
	FALSE	ILDIFMMLTSR	1xOxidation [M7]	1	1	1	lcl	[protein=F317L] [protein_id=UYC33117.1] [location=complement(55017..55970)] [gbkey=CDS]	0	1355.71	11	Medium	16.549	1.22
FALSE	Master Protein	lcl	[protein=C257L] [protein_id=UYC33140.1] [location=complement(84982..85755)] [gbkey=CDS]	2	1	1	257	29.7	8.88	0	1	1
	Checked	Sequence	Modifications	# Protein Groups	# Proteins	# PSMs	Master Protein Accessions	Master Protein Descriptions	# Missed Cleavages	Theo. MH+ [Da]	Sequence Length	Confidence (by Search Engine): Sequest HT	RT [min] (by Search Engine): Sequest HT	XCorr (by Search Engine): Sequest HT
	FALSE	DAITLK		1	1	1	lcl	[protein=C257L] [protein_id=UYC33140.1] [location=complement(84982..85755)] [gbkey=CDS]	0	660.393	6	Medium	13.5098	0.71
FALSE	Master Protein	lcl	[protein=NP868R] [protein_id=UYC33175.1] [location=134860..137466] [gbkey=CDS]	1	1	1	868	99.8	8.4	0	1	1
	Checked	Sequence	Modifications	# Protein Groups	# Proteins	# PSMs	Master Protein Accessions	Master Protein Descriptions	# Missed Cleavages	Theo. MH+ [Da]	Sequence Length	Confidence (by Search Engine): Sequest HT	RT [min] (by Search Engine): Sequest HT	XCorr (by Search Engine): Sequest HT
	FALSE	VLQAFNIK		1	1	1	lcl	[protein=NP868R] [protein_id=UYC33175.1] [location=134860..137466] [gbkey=CDS]	0	932.556	8	Medium	25.0447	0.99
FALSE	Master Protein	lcl	[protein=B475L] [protein_id=UYC33152.1] [location=complement(98079..99506)] [gbkey=CDS]	1	1	1	475	56	5.06	0	1	1
	Checked	Sequence	Modifications	# Protein Groups	# Proteins	# PSMs	Master Protein Accessions	Master Protein Descriptions	# Missed Cleavages	Theo. MH+ [Da]	Sequence Length	Confidence (by Search Engine): Sequest HT	RT [min] (by Search Engine): Sequest HT	XCorr (by Search Engine): Sequest HT
	FALSE	EAVLDIK		1	1	1	lcl	[protein=B475L] [protein_id=UYC33152.1] [location=complement(98079..99506)] [gbkey=CDS]	0	787.456	7	Medium	26.4191	1.01
FALSE	Master Protein	lcl	[protein=NP1450L] [protein_id=UYC33173.1] [location=complement(129101..133453)] [gbkey=CDS]	2	2	2	1450	163.6	8.5	0	2	1
	Checked	Sequence	Modifications	# Protein Groups	# Proteins	# PSMs	Master Protein Accessions	Master Protein Descriptions	# Missed Cleavages	Theo. MH+ [Da]	Sequence Length	Confidence (by Search Engine): Sequest HT	RT [min] (by Search Engine): Sequest HT	XCorr (by Search Engine): Sequest HT
	FALSE	VEAELLCSVR	1xCarbamidomethyl [C7]	1	1	1	lcl	[protein=NP1450L] [protein_id=UYC33173.1] [location=complement(129101..133453)] [gbkey=CDS]	0	1175.61	10	Medium	17.7686	0.88
	FALSE	RGIVMGARPAPSIMRR	2xOxidation [M5; M14]	1	1	1	lcl	[protein=NP1450L] [protein_id=UYC33173.1] [location=complement(129101..133453)] [gbkey=CDS]	2	1799.98	16	Medium	24.6035	1.13
FALSE	Master Protein	lcl	[protein=E199L] [protein_id=UYC33203.1] [location=complement(165881..166480)] [gbkey=CDS]	3	1	1	199	22	6.28	0	1	1
	Checked	Sequence	Modifications	# Protein Groups	# Proteins	# PSMs	Master Protein Accessions	Master Protein Descriptions	# Missed Cleavages	Theo. MH+ [Da]	Sequence Length	Confidence (by Search Engine): Sequest HT	RT [min] (by Search Engine): Sequest HT	XCorr (by Search Engine): Sequest HT
	FALSE	NILTNK		1	1	1	lcl	[protein=E199L] [protein_id=UYC33203.1] [location=complement(165881..166480)] [gbkey=CDS]	0	702.414	6	Medium	11.2576	0.75
FALSE	Master Protein	lcl	[protein=NP419L] [protein_id=UYC33174.1] [location=complement(133536..134795)] [gbkey=CDS]	1	1	1	419	48.1	9.31	0	1	1
	Checked	Sequence	Modifications	# Protein Groups	# Proteins	# PSMs	Master Protein Accessions	Master Protein Descriptions	# Missed Cleavages	Theo. MH+ [Da]	Sequence Length	Confidence (by Search Engine): Sequest HT	RT [min] (by Search Engine): Sequest HT	XCorr (by Search Engine): Sequest HT
	FALSE	ISKMTR	1xOxidation [M4]	1	1	1	lcl	[protein=NP419L] [protein_id=UYC33174.1] [location=complement(133536..134795)] [gbkey=CDS]	1	751.413	6	Medium	12.8158	1
FALSE	Master Protein	lcl	[protein=D1133L] [protein_id=UYC33180.1] [location=complement(140645..143776)] [gbkey=CDS]	1	1	1	1043	118.9	8.18	0	1	1
	Checked	Sequence	Modifications	# Protein Groups	# Proteins	# PSMs	Master Protein Accessions	Master Protein Descriptions	# Missed Cleavages	Theo. MH+ [Da]	Sequence Length	Confidence (by Search Engine): Sequest HT	RT [min] (by Search Engine): Sequest HT	XCorr (by Search Engine): Sequest HT
	FALSE	LFNITSKGEEK		1	1	1	lcl	[protein=D1133L] [protein_id=UYC33180.1] [location=complement(140645..143776)] [gbkey=CDS]	1	1265.67	11	Medium	15.7468	1.12
FALSE	Master Protein	lcl	[protein=C962R] [protein_id=UYC33145.1] [location=89102..91990] [gbkey=CDS]	1	1	1	962	111.3	7.39	0	1	1
	Checked	Sequence	Modifications	# Protein Groups	# Proteins	# PSMs	Master Protein Accessions	Master Protein Descriptions	# Missed Cleavages	Theo. MH+ [Da]	Sequence Length	Confidence (by Search Engine): Sequest HT	RT [min] (by Search Engine): Sequest HT	XCorr (by Search Engine): Sequest HT
	FALSE	KQGALMYFLER		1	1	1	lcl	[protein=C962R] [protein_id=UYC33145.1] [location=89102..91990] [gbkey=CDS]	1	1355.71	11	Medium	33.914	0.83
FALSE	Master Protein	lcl	[protein=F334L] [protein_id=UYC33118.1] [location=complement(55996..57000)] [gbkey=CDS]	2	1	1	334	39.8	5.22	0	1	1
	Checked	Sequence	Modifications	# Protein Groups	# Proteins	# PSMs	Master Protein Accessions	Master Protein Descriptions	# Missed Cleavages	Theo. MH+ [Da]	Sequence Length	Confidence (by Search Engine): Sequest HT	RT [min] (by Search Engine): Sequest HT	XCorr (by Search Engine): Sequest HT
	FALSE	NTLGER		1	1	1	lcl	[protein=F334L] [protein_id=UYC33118.1] [location=complement(55996..57000)] [gbkey=CDS]	0	689.358	6	Medium	39.2082	0.95
FALSE	Master Protein	lcl	[protein=A859L] [protein_id=UYC33114.1] [location=complement(51221..53797)] [gbkey=CDS]	2	1	1	858	98.3	8.41	0	1	1
	Checked	Sequence	Modifications	# Protein Groups	# Proteins	# PSMs	Master Protein Accessions	Master Protein Descriptions	# Missed Cleavages	Theo. MH+ [Da]	Sequence Length	Confidence (by Search Engine): Sequest HT	RT [min] (by Search Engine): Sequest HT	XCorr (by Search Engine): Sequest HT
	FALSE	GFMIPPQQAQDLDR	1xOxidation [M3]	1	1	1	lcl	[protein=A859L] [protein_id=UYC33114.1] [location=complement(51221..53797)] [gbkey=CDS]	0	1631.78	14	Medium	45.095	1.16
FALSE	Master Protein	lcl	[protein=F1055L] [protein_id=UYC33121.1] [location=complement(59874..63020)] [gbkey=CDS]	2	1	1	1048	123.1	7.55	0	1	1
	Checked	Sequence	Modifications	# Protein Groups	# Proteins	# PSMs	Master Protein Accessions	Master Protein Descriptions	# Missed Cleavages	Theo. MH+ [Da]	Sequence Length	Confidence (by Search Engine): Sequest HT	RT [min] (by Search Engine): Sequest HT	XCorr (by Search Engine): Sequest HT
	FALSE	HQDYVNIASAETIDANK		1	1	1	lcl	[protein=F1055L] [protein_id=UYC33121.1] [location=complement(59874..63020)] [gbkey=CDS]	0	1888.9	17	Medium	27.5128	1.3
FALSE	Master Protein	lcl	[protein=MGF_360-3L] [protein_id=UYC33057.1] [location=complement(4584..5654)] [gbkey=CDS]	4	2	2	356	41.8	6.18	0	2	1
	Checked	Sequence	Modifications	# Protein Groups	# Proteins	# PSMs	Master Protein Accessions	Master Protein Descriptions	# Missed Cleavages	Theo. MH+ [Da]	Sequence Length	Confidence (by Search Engine): Sequest HT	RT [min] (by Search Engine): Sequest HT	XCorr (by Search Engine): Sequest HT
	FALSE	TLCFKEGIR	1xCarbamidomethyl [C3]	1	1	1	lcl	[protein=MGF_360-3L] [protein_id=UYC33057.1] [location=complement(4584..5654)] [gbkey=CDS]	1	1123.59	9	Medium	13.9915	0.8
	FALSE	INTLLK		1	1	1	lcl	[protein=MGF_360-3L] [protein_id=UYC33057.1] [location=complement(4584..5654)] [gbkey=CDS]	0	701.456	6	Medium	23.4648	1.02
FALSE	Master Protein	lcl	[protein=M1249L] [protein_id=UYC33134.1] [location=complement(75719..79468)] [gbkey=CDS]	0	1	1	1249	144.3	5.81	0	1	1
	Checked	Sequence	Modifications	# Protein Groups	# Proteins	# PSMs	Master Protein Accessions	Master Protein Descriptions	# Missed Cleavages	Theo. MH+ [Da]	Sequence Length	Confidence (by Search Engine): Sequest HT	RT [min] (by Search Engine): Sequest HT	XCorr (by Search Engine): Sequest HT
	FALSE	VLESIR		1	1	1	lcl	[protein=M1249L] [protein_id=UYC33134.1] [location=complement(75719..79468)] [gbkey=CDS]	0	716.43	6	Medium	15.9191	0.9
FALSE	Master Protein	lcl	[protein=EP364R] [protein_id=UYC33133.1] [location=74546..75655] [gbkey=CDS]	3	1	1	369	41.3	9.04	0	1	1
	Checked	Sequence	Modifications	# Protein Groups	# Proteins	# PSMs	Master Protein Accessions	Master Protein Descriptions	# Missed Cleavages	Theo. MH+ [Da]	Sequence Length	Confidence (by Search Engine): Sequest HT	RT [min] (by Search Engine): Sequest HT	XCorr (by Search Engine): Sequest HT
	FALSE	KTYKDFAASLK		1	1	1	lcl	[protein=EP364R] [protein_id=UYC33133.1] [location=74546..75655] [gbkey=CDS]	2	1271.7	11	Medium	20.213	1.09
FALSE	Master Protein	lcl	[protein=MGF_505-2R] [protein_id=UYC33097.1] [location=33133..34713] [gbkey=CDS]	2	1	1	526	62.2	9.16	0	1	1
	Checked	Sequence	Modifications	# Protein Groups	# Proteins	# PSMs	Master Protein Accessions	Master Protein Descriptions	# Missed Cleavages	Theo. MH+ [Da]	Sequence Length	Confidence (by Search Engine): Sequest HT	RT [min] (by Search Engine): Sequest HT	XCorr (by Search Engine): Sequest HT
	FALSE	EKVMFYLAK	1xOxidation [M4]	1	1	1	lcl	[protein=MGF_505-2R] [protein_id=UYC33097.1] [location=33133..34713] [gbkey=CDS]	1	1144.61	9	Medium	12.2736	1.06
FALSE	Master Protein	lcl	[protein=MGF_360-6L] [protein_id=UYC33081.1] [location=complement(17229..18356)] [gbkey=CDS]	2	1	1	375	43.9	8.22	0	1	1
	Checked	Sequence	Modifications	# Protein Groups	# Proteins	# PSMs	Master Protein Accessions	Master Protein Descriptions	# Missed Cleavages	Theo. MH+ [Da]	Sequence Length	Confidence (by Search Engine): Sequest HT	RT [min] (by Search Engine): Sequest HT	XCorr (by Search Engine): Sequest HT
	FALSE	IQETLLR		1	1	1	lcl	[protein=MGF_360-6L] [protein_id=UYC33081.1] [location=complement(17229..18356)] [gbkey=CDS]	0	872.52	7	Medium	18.9131	0.8
FALSE	Master Protein	lcl	[protein=MGF_360-1L] [protein_id=UYC33052.1] [location=complement(856..1689)] [gbkey=CDS]	3	1	1	277	32.5	5.12	0	1	1
	Checked	Sequence	Modifications	# Protein Groups	# Proteins	# PSMs	Master Protein Accessions	Master Protein Descriptions	# Missed Cleavages	Theo. MH+ [Da]	Sequence Length	Confidence (by Search Engine): Sequest HT	RT [min] (by Search Engine): Sequest HT	XCorr (by Search Engine): Sequest HT
	FALSE	KALSENK		1	1	1	lcl	[protein=MGF_360-1L] [protein_id=UYC33052.1] [location=complement(856..1689)] [gbkey=CDS]	1	789.446	7	Medium	9.6928	0.89
FALSE	Master Protein	lcl	[protein=MGF_360-16R] [protein_id=UYC33220.1] [location=176644..177702] [gbkey=CDS]	2	1	1	352	40.6	8.27	0	1	1
	Checked	Sequence	Modifications	# Protein Groups	# Proteins	# PSMs	Master Protein Accessions	Master Protein Descriptions	# Missed Cleavages	Theo. MH+ [Da]	Sequence Length	Confidence (by Search Engine): Sequest HT	RT [min] (by Search Engine): Sequest HT	XCorr (by Search Engine): Sequest HT
	FALSE	IMLTLK	1xOxidation [M2]	1	1	1	lcl	[protein=MGF_360-16R] [protein_id=UYC33220.1] [location=176644..177702] [gbkey=CDS]	0	734.448	6	Medium	34.7082	0.74
FALSE	Master Protein	lcl	[protein=MGF_505-7R] [protein_id=UYC33103.1] [location=40763..42346] [gbkey=CDS]	2	1	1	527	61.6	8.65	0	1	1
	Checked	Sequence	Modifications	# Protein Groups	# Proteins	# PSMs	Master Protein Accessions	Master Protein Descriptions	# Missed Cleavages	Theo. MH+ [Da]	Sequence Length	Confidence (by Search Engine): Sequest HT	RT [min] (by Search Engine): Sequest HT	XCorr (by Search Engine): Sequest HT
	FALSE	KNLLDATLTR		1	1	1	lcl	[protein=MGF_505-7R] [protein_id=UYC33103.1] [location=40763..42346] [gbkey=CDS]	1	1144.67	10	Medium	36.4196	0.86
FALSE	Master Protein	lcl	[protein=MGF_505-6R] [protein_id=UYC33102.1] [location=39056..40633] [gbkey=CDS]	2	1	1	525	61.4	7.61	0	1	1
	Checked	Sequence	Modifications	# Protein Groups	# Proteins	# PSMs	Master Protein Accessions	Master Protein Descriptions	# Missed Cleavages	Theo. MH+ [Da]	Sequence Length	Confidence (by Search Engine): Sequest HT	RT [min] (by Search Engine): Sequest HT	XCorr (by Search Engine): Sequest HT
	FALSE	HTLQWLGLYWK		1	1	1	lcl	[protein=MGF_505-6R] [protein_id=UYC33102.1] [location=39056..40633] [gbkey=CDS]	0	1444.77	11	Medium	26.1245	0.83
FALSE	Master Protein	lcl	[protein=CP2475L] [protein_id=UYC33166.1] [location=complement(117290..124720)] [gbkey=CDS]	1	2	2	2476	281	6.54	0	2	1
	Checked	Sequence	Modifications	# Protein Groups	# Proteins	# PSMs	Master Protein Accessions	Master Protein Descriptions	# Missed Cleavages	Theo. MH+ [Da]	Sequence Length	Confidence (by Search Engine): Sequest HT	RT [min] (by Search Engine): Sequest HT	XCorr (by Search Engine): Sequest HT
	FALSE	GQTRTLGSNRER		1	1	1	lcl	[protein=CP2475L] [protein_id=UYC33166.1] [location=complement(117290..124720)] [gbkey=CDS]	2	1374.72	12	Medium	15.7973	1
	FALSE	MVTEVTK	1xOxidation [M1]	1	1	1	lcl	[protein=CP2475L] [protein_id=UYC33166.1] [location=complement(117290..124720)] [gbkey=CDS]	0	823.423	7	Medium	16.999	0.77
FALSE	Master Protein	lcl	[protein=G1211R] [protein_id=UYC33164.1] [location=113199..116819] [gbkey=CDS]	2	2	2	1206	139.4	8.18	0	2	1
	Checked	Sequence	Modifications	# Protein Groups	# Proteins	# PSMs	Master Protein Accessions	Master Protein Descriptions	# Missed Cleavages	Theo. MH+ [Da]	Sequence Length	Confidence (by Search Engine): Sequest HT	RT [min] (by Search Engine): Sequest HT	XCorr (by Search Engine): Sequest HT
	FALSE	GESLHYVSFHFNNR		1	1	1	lcl	[protein=G1211R] [protein_id=UYC33164.1] [location=113199..116819] [gbkey=CDS]	0	1706.8	14	Medium	41.4908	0.89
	FALSE	GIDIIK		1	1	1	lcl	[protein=G1211R] [protein_id=UYC33164.1] [location=113199..116819] [gbkey=CDS]	0	658.413	6	Medium	27.8637	1.16
FALSE	Master Protein	lcl	[protein=S273R] [protein_id=UYC33185.1] [location=146710..147531] [gbkey=CDS]	4	1	1	273	31.6	8.72	0	1	1
	Checked	Sequence	Modifications	# Protein Groups	# Proteins	# PSMs	Master Protein Accessions	Master Protein Descriptions	# Missed Cleavages	Theo. MH+ [Da]	Sequence Length	Confidence (by Search Engine): Sequest HT	RT [min] (by Search Engine): Sequest HT	XCorr (by Search Engine): Sequest HT
	FALSE	VHYKFNQVDMVK	1xOxidation [M10]	1	1	1	lcl	[protein=S273R] [protein_id=UYC33185.1] [location=146710..147531] [gbkey=CDS]	1	1523.77	12	Medium	10.5201	1.13
FALSE	Master Protein	lcl	[protein=CP123L] [protein_id=UYC33165.1] [location=complement(116816..117184)] [gbkey=CDS]	8	1	1	122	13.9	8.91	0	1	1
	Checked	Sequence	Modifications	# Protein Groups	# Proteins	# PSMs	Master Protein Accessions	Master Protein Descriptions	# Missed Cleavages	Theo. MH+ [Da]	Sequence Length	Confidence (by Search Engine): Sequest HT	RT [min] (by Search Engine): Sequest HT	XCorr (by Search Engine): Sequest HT
	FALSE	KYDHNEYMEK		1	1	1	lcl	[protein=CP123L] [protein_id=UYC33165.1] [location=complement(116816..117184)] [gbkey=CDS]	1	1356.59	10	Medium	16.6318	0.94
FALSE	Master Protein	lcl	[protein=MGF_360-8L] [protein_id=UYC33089.1] [location=complement(23054..24013)] [gbkey=CDS]	2	1	1	319	37.6	8.1	0	1	1
	Checked	Sequence	Modifications	# Protein Groups	# Proteins	# PSMs	Master Protein Accessions	Master Protein Descriptions	# Missed Cleavages	Theo. MH+ [Da]	Sequence Length	Confidence (by Search Engine): Sequest HT	RT [min] (by Search Engine): Sequest HT	XCorr (by Search Engine): Sequest HT
	FALSE	DLKDLK		1	1	1	lcl	[protein=MGF_360-8L] [protein_id=UYC33089.1] [location=complement(23054..24013)] [gbkey=CDS]	1	731.43	6	Medium	17.2703	0.83
