# Supplementary material for: Chloroquine Phosphate Targets the MAPK-ERK Pathway to Inhibit ASFV SY- 1 Replication In Vitro
Source: Research Square preprint supplement (doi:10.21203/rs.3.rs-8029940/v1), 2025-11-24
Supplement: Supplementary file 5 [file 97a4f18a493f809bc15e2c57.docx]

**Supplementary Figure**


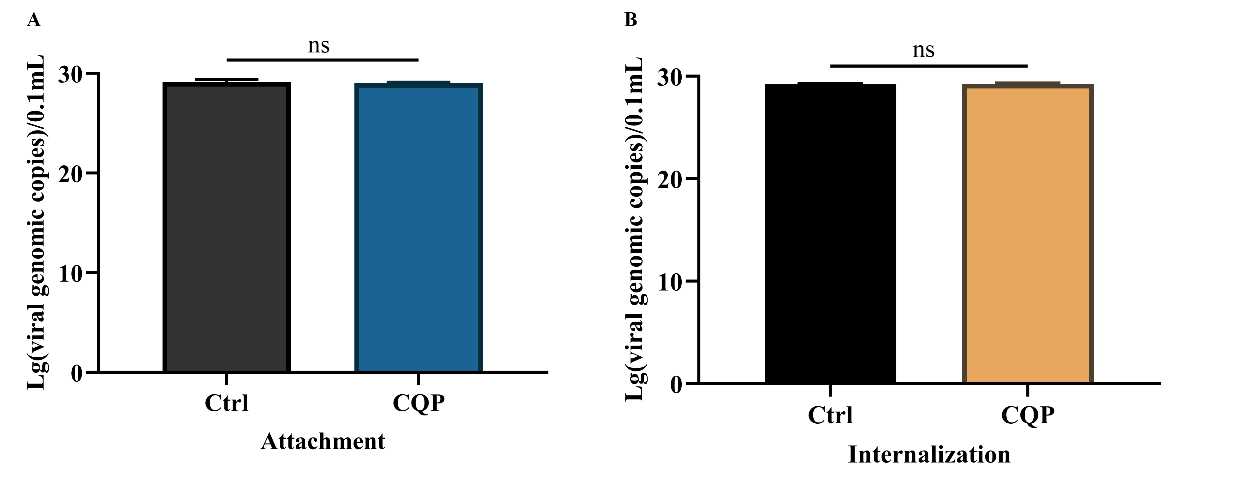


**Supplementary Figure1. Effects of CQP on viral attachment and internalization**. PAMs were incubated with ASFV (MOI=5) and 12.5µMCQP at 4 ◦ C for 1 h, and collected the cells to detect the viral copies by qPCR**(A)**. Next, the cells derived from the 4 ◦ C were washed three times with cold PBS, and 12.5µM CQP were added to well plates to incubated at 37 ◦ C for 2 h, and the cells were collected to detect the viral copies by qPCR**(B)**.


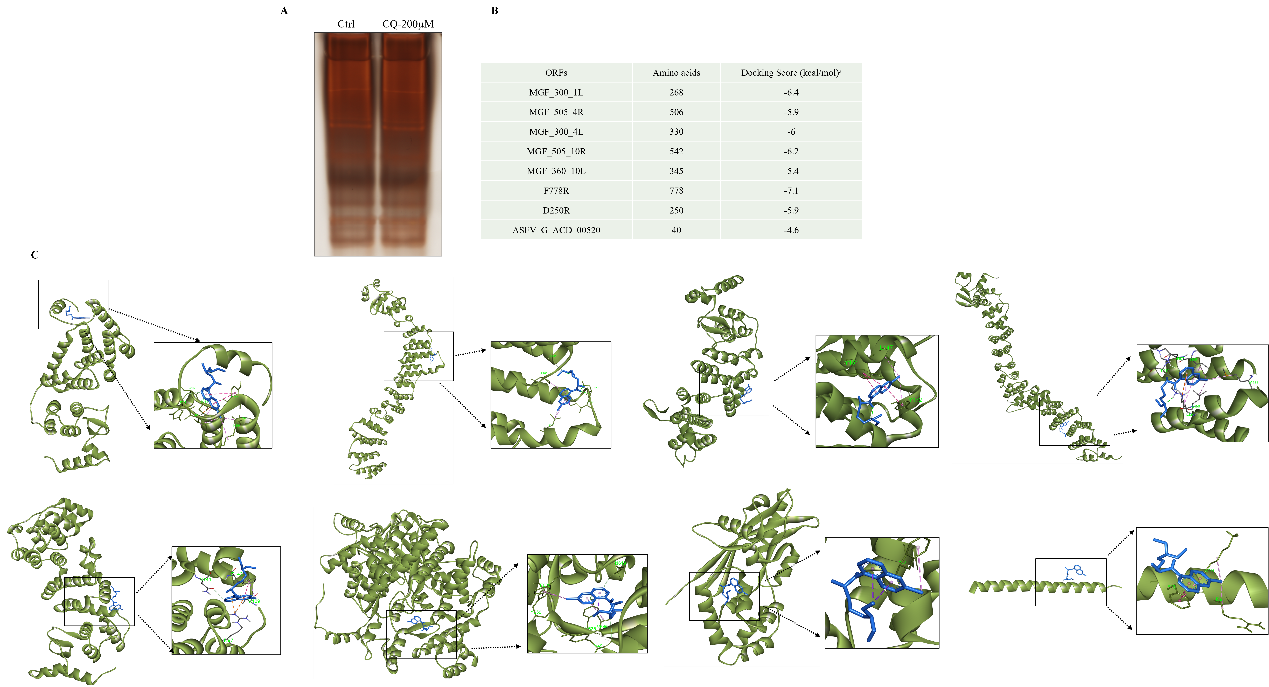


**Supplementary Figure2. Identification of viral protein by liquid** **chromatography-mass spectrometry/mass Spectrometry (LC-MS/MS) and the binding site by molecular docking simulations.** **(A -C)** PAMs were infected ASFV for 6h and lysed the cells by western blotting and IP lysis solution. The supernatants were used to incubate with 200µMCQP and the water as the control for overnight at 4 ◦C, next the supernatants were added native gel sample loading buffer to perform the native gel and silver staining. The strips were cut down for mass spectrometry analysis**(A)**. Molecular docking simulations were used to analyze the docking score **(B)** and potential binding site**(C)**.
