# Supplementary material for: Chloroquine Phosphate Targets the MAPK-ERK Pathway to Inhibit ASFV SY- 1 Replication In Vitro
Source: Research Square preprint supplement (doi:10.21203/rs.3.rs-8029940/v1), 2025-11-24
Supplement: Supplementary file 6 [file d6f506c64474f76756bec1db.xlsx]

## Sheet: Sheet1
Supplementary Table1: EDGs of 0h
ENSEMBL	SYMBOL	baseMean	log2FoldChange	lfcSE	stat	pvalue	padj	0h-control-1	0h-control-2	0h-control-3	0h-CQP-1	0h-CQP-2	0h-CQP-3
ENSSSCG00000046527	gene_sourceensembl	4.97536	-4.64379	1.42719	-3.25379	0.00537651	1	1.01595	0	0	12.2408	4.83022	11.7652
ENSSSCG00000027002	KLHL32	4.37418	-3.50585	1.3302	-2.63558	0.0301478	1	0	0.928204	1.28508	10.3576	10.4655	3.20868
ENSSSCG00000038958	DNM3	6.20316	-2.91656	1.01494	-2.87362	0.029547	1	2.0319	0	2.57016	14.124	12.0756	6.41737
ENSSSCG00000033179	gene_sourceensembl	13.4501	-2.62359	0.655861	-4.00023	0.00665223	1	3.04785	6.49743	1.28508	19.7736	26.5662	23.5303
ENSSSCG00000009667	gene_sourceensembl	8.05547	-2.47637	0.830604	-2.9814	0.0377605	1	2.0319	2.78461	2.57016	19.7736	13.6856	7.48693
ENSSSCG00000022483	GPBAR1	10.4257	-2.43932	0.742631	-3.2847	0.0263051	1	5.07975	0.928204	3.85524	17.8904	11.2705	23.5303
ENSSSCG00000037347	gene_sourceensembl	7.49095	-2.37413	0.827833	-2.86789	0.0484885	1	3.04785	2.78461	1.28508	13.1824	12.8806	11.7652
ENSSSCG00000023647	WNT8A	14.719	-2.20336	0.610961	-3.60638	0.0244412	1	8.12759	3.71281	3.85524	34.8392	21.736	16.0434
ENSSSCG00000046533	gene_sourceensembl	40.3152	-2.14094	0.394802	-5.42282	0.00192678	0.496383	16.2552	23.2051	3.85524	55.5544	66.013	77.0084
ENSSSCG00000006624	SELENBP1	39.6265	-2.01288	0.355769	-5.65783	0.00220655	0.512104	16.2552	16.7077	14.1359	72.5032	66.8181	51.3389
ENSSSCG00000061477	gene_sourceensembl	283.633	-1.99498	0.138902	-14.3625	3.94e-13	2.69e-10	109.723	116.025	115.657	441.61	458.871	459.911
ENSSSCG00000033574	CFAP54	23.4669	-1.79993	0.454317	-3.96183	0.0391422	1	8.12759	8.35383	15.421	37.664	30.5914	40.6433
ENSSSCG00000004136	AIG1	38.8578	-1.75726	0.384387	-4.57158	0.024417	1	20.319	23.2051	8.99556	67.7952	73.2584	39.5738
ENSSSCG00000006238	CYP7A1	34292	-1.75552	0.0625529	-28.0646	6.89e-34	3.14e-30	15984.9	16192.5	14831.1	49670.3	54921.2	54151.9
ENSSSCG00000006911	TGFBR3	24.678	-1.72876	0.437659	-3.95002	0.0479423	1	10.1595	9.28204	15.421	33.8976	45.0821	34.226
ENSSSCG00000060076	gene_sourceensembl	74.3317	-1.71417	0.264177	-6.48874	0.00343175	0.732142	36.5742	29.7025	38.5524	92.2768	134.441	114.443
ENSSSCG00000032674	TCEA3	103.53	-1.68267	0.227875	-7.38417	0.00136865	0.359376	59.941	47.3384	39.8375	152.539	183.548	137.973
ENSSSCG00000056181	gene_sourceensembl	42.4172	-1.68197	0.384497	-4.37446	0.0380598	1	18.2871	34.3435	6.4254	70.62	62.7929	62.0346
ENSSSCG00000031378	KBTBD6	64.388	-1.61534	0.267795	-6.03199	0.0107868	1	28.4466	34.3435	32.127	91.3352	94.1893	105.887
ENSSSCG00000063105	gene_sourceensembl	154.64	-1.51437	0.180726	-8.37939	0.00221256	0.512104	91.4354	78.8973	69.3943	209.977	237.486	240.651
ENSSSCG00000009668	CLU	4233.81	-1.42978	0.0647249	-22.0901	1.57e-11	9.3e-09	2252.36	2351.14	2273.31	6273.88	6411.32	5840.87
ENSSSCG00000022309	GPR34	515.499	-1.38428	0.13581	-10.1928	0.00233065	0.521684	293.609	321.158	240.31	773.054	854.144	610.72
ENSSSCG00000010507	TLL2	1163.6	-1.35494	0.0839668	-16.1366	1.18e-05	0.00414385	657.319	671.091	633.544	1672.28	1775.11	1572.26
ENSSSCG00000009231	CDS1	474.933	-1.35199	0.111567	-12.1181	0.000802613	0.219177	267.195	280.318	253.161	634.639	692.332	721.954
ENSSSCG00000012118	TLR8	1969.15	-1.22969	0.071273	-17.2533	0.000634837	0.176899	1235.39	1168.61	1125.73	2702.39	2754.84	2827.92
ENSSSCG00000040631	LPL	25911.9	1.1168	0.0620142	18.0088	0.0298186	1	35091.9	37821.5	33491.8	16006.3	16946.8	16112.9
ENSSSCG00000039651	SLC2A5	7664.76	1.13872	0.0619501	18.3813	0.01257	1	10246.9	10588.9	10793.4	4911.39	4952.59	4495.37
ENSSSCG00000040648	CCL8	2319.95	1.14231	0.0837795	13.6347	0.0446962	1	3039.72	3018.52	3521.12	1505.62	1317.04	1517.71
ENSSSCG00000035256	SPN	4430.37	1.14762	0.0876079	13.0995	0.0459927	1	6022.55	6156.78	6140.11	2964.16	3004.4	2294.21
ENSSSCG00000059119	gene_sourceensembl	719.127	1.18138	0.10929	10.8096	0.0484966	1	935.689	968.116	1089.75	487.749	376.757	456.703
ENSSSCG00000039798	SLC11A1	11286.7	1.18935	0.0701861	16.9457	0.00348927	0.732961	15134.6	15642.1	16305.1	7180.64	7263.85	6193.83
ENSSSCG00000056379	CD24	21428.1	1.20805	0.0785105	15.3872	0.00402446	0.832576	28261.7	29236.6	32228.5	12179.6	12082	14580.3
ENSSSCG00000015375	ITGB8	5195.76	1.21331	0.0926437	13.0965	0.0106539	1	7042.56	6697.92	8038.18	3032.89	2753.23	3609.77
ENSSSCG00000036956	SOCS3	1845.24	1.22793	0.0968813	12.6746	0.00931976	1	2440.31	2347.43	2974.96	1192.07	1126.25	990.414
ENSSSCG00000021259	CDA	2521.41	1.24293	0.0853537	14.5621	0.00221284	0.512104	3322.15	3594	3721.59	1665.69	1506.22	1318.77
ENSSSCG00000011298	CDCP1	727.668	1.2501	0.0997217	12.5359	0.00607148	1	1039.32	1060.01	975.376	391.706	478.192	421.407
ENSSSCG00000009808	TMEM120B	775.421	1.25663	0.090436	13.8952	0.00227201	0.517033	1091.13	1086	1101.31	467.975	429.085	477.024
ENSSSCG00000025560	PGLYRP2	174.873	1.35432	0.188767	7.17457	0.0302563	1	241.796	212.559	301.994	102.634	114.315	75.9389
ENSSSCG00000032343	CCL4	1011.99	1.35688	0.0856617	15.84	1.55e-05	0.00528728	1363.4	1497.19	1507.4	582.85	572.381	548.685
ENSSSCG00000033327	PDGFB	375.619	1.3634	0.118381	11.517	0.00107123	0.286794	525.246	534.645	562.865	222.218	198.039	210.704
ENSSSCG00000009216	SPP1	139190	1.36685	0.0552027	24.7606	1.51e-11	9.3e-09	195629	209367	196806	78620.8	79206.8	75512.1
ENSSSCG00000031109	HILPDA	1527.17	1.37628	0.0760381	18.0999	3.74e-07	0.000145817	2105.05	2319.58	2189.78	832.375	857.365	858.858
ENSSSCG00000023522	TGM2	1976.4	1.41738	0.0909713	15.5805	2.24e-06	0.000825636	2762.37	3038.94	2829.75	1167.58	1149.59	910.197
ENSSSCG00000033520	IL23A	2028.03	1.42476	0.0958171	14.8696	4.65e-06	0.00166959	2779.64	2709.43	3377.19	1209.01	990.196	1102.72
ENSSSCG00000022447	F3	668.555	1.4267	0.104432	13.6615	2.2e-05	0.00731214	909.275	1046.09	970.235	359.691	397.688	328.355
ENSSSCG00000017705	CCL5	12924.1	1.4453	0.0830513	17.4025	4.12e-08	1.81e-05	17811.6	18557.6	20351.8	7759.73	7003.82	6060.13
ENSSSCG00000037559	ACOT11	70.0154	1.45429	0.25409	5.72351	0.0368966	1	102.611	103.031	101.521	41.4304	29.7864	41.7129
ENSSSCG00000032878	SHISA9	62.9214	1.46837	0.265623	5.52804	0.0389248	1	95.4992	90.964	91.2407	37.664	35.4216	26.739
ENSSSCG00000008953	CXCL8	252844	1.47149	0.16469	8.93486	0.00209919	0.512104	347847	349983	417155	127340	115763	158974
ENSSSCG00000013498	EBI3	250.465	1.4841	0.168101	8.82859	0.00198973	0.503106	327.136	398.199	380.384	161.955	98.2145	136.904
ENSSSCG00000060276	gene_sourceensembl	27281.3	1.52383	0.156191	9.75618	0.000398614	0.114603	37625.7	36353.1	47472.1	13557.2	12824.2	15855.2
ENSSSCG00000004891	SERPINB7	784.791	1.52542	0.237376	6.42617	0.0134333	1	1103.32	1024.74	1366.04	352.158	343.751	518.737
ENSSSCG00000001097	RIPOR2	110.15	1.5268	0.222264	6.86929	0.00889073	1	182.871	181	125.938	47.08	58.7677	65.2432
ENSSSCG00000016959	MARVELD2	81.9188	1.52903	0.251862	6.07091	0.0178437	1	92.4514	142.943	129.793	35.7808	46.6922	43.852
ENSSSCG00000000807	SLC38A1	73.8736	1.53304	0.255628	5.99716	0.0185246	1	99.563	118.81	110.517	29.1896	37.0317	48.1303
ENSSSCG00000008959	CXCL2	13505.4	1.53873	0.192953	7.97465	0.0026189	0.576749	18570.5	17861.4	23851.1	6499.87	6041.8	8207.81
ENSSSCG00000054191	gene_sourceensembl	93.9283	1.54313	0.225576	6.84081	0.00802618	1	136.137	153.154	129.793	57.4376	41.0569	45.9911
ENSSSCG00000027607	IER3	5549.48	1.55116	0.0765094	20.2741	2.93e-13	2.1e-10	7831.95	7839.61	9158.77	2821.98	2993.13	2651.44
ENSSSCG00000041481	DMKN	60.7808	1.55222	0.2827	5.49071	0.0253869	1	78.2281	96.5332	97.6661	22.5984	38.6418	31.0173
ENSSSCG00000009490	DCT	181.434	1.6131	0.172018	9.37752	0.000182501	0.054171	242.812	260.825	317.415	81.9192	92.5793	93.0518
ENSSSCG00000013595	CERS4	88.9637	1.63992	0.243805	6.72638	0.00433587	0.861875	147.313	104.887	152.925	44.2552	49.1073	35.2955
ENSSSCG00000004572	gene_sourceensembl	36.9653	1.6401	0.378667	4.33123	0.0454766	1	40.638	50.123	77.1048	22.5984	12.0756	19.2521
ENSSSCG00000017237	CD300LB	87.6498	1.65393	0.241059	6.8611	0.00333652	0.723125	150.36	133.661	115.657	36.7224	53.1325	36.3651
ENSSSCG00000021220	CKB	1386.11	1.66122	0.101071	16.4361	3.03e-11	1.73e-08	2110.13	2168.28	2041.99	781.528	661.741	552.963
ENSSSCG00000056251	CCL22	9427.48	1.66351	0.0658996	25.2432	3.8e-24	8.66e-21	13504	15101.9	14390.3	4467.89	4781.92	4318.89
ENSSSCG00000009616	HR	65.1822	1.67067	0.282672	5.91028	0.0088315	1	89.4035	103.031	105.377	44.2552	26.5662	22.4608
ENSSSCG00000004907	CCBE1	30.048	1.69301	0.398231	4.25133	0.0409095	1	37.5901	48.2666	51.4032	12.2408	10.4655	20.3217
ENSSSCG00000017700	CCL3L1	4995.08	1.74781	0.0829172	21.079	9.51e-20	1.62e-16	7176.67	7794.13	8124.28	2608.23	2155.89	2111.31
ENSSSCG00000002829	MMP2	671.923	1.77469	0.101693	17.4515	1.29e-14	1.17e-11	1033.22	1060.01	1028.06	330.502	312.354	267.39
ENSSSCG00000058216	IGFBP3	32.3111	1.82365	0.382698	4.76526	0.0156896	1	55.8772	53.8358	41.1226	10.3576	14.4907	18.1825
ENSSSCG00000023737	CSF2	108.523	1.83214	0.222108	8.24885	8.96e-05	0.0272	176.775	175.431	156.78	35.7808	60.3778	45.9911
ENSSSCG00000008429	EPCAM	5783.11	1.83434	0.0671672	27.3101	9.94e-36	6.79e-32	8601.03	9178.08	9318.12	2407.67	2480.32	2713.48
ENSSSCG00000039419	SLCO4A1	269.098	1.84126	0.155073	11.8735	2.9e-08	1.32e-05	374.885	390.774	497.326	130.882	109.485	111.234
ENSSSCG00000040513	AQP3	683.797	1.84509	0.0994927	18.545	9.98e-18	1.36e-14	1051.51	1045.16	1114.16	321.086	297.059	273.808
ENSSSCG00000008957	AMCF0II	70683.1	1.84694	0.0826225	22.354	5.87e-25	1.6e-21	105572	106549	119726	29164.2	27887.3	35200.3
ENSSSCG00000040904	CLDN1	36.18	1.86341	0.356742	5.22341	0.00775466	1	58.9251	51.9794	59.1137	14.124	13.6856	19.2521
ENSSSCG00000016254	gene_sourceensembl	271.233	1.86834	0.147432	12.6726	1.93e-09	9.43e-07	420.603	394.487	461.344	119.583	99.8246	131.556
ENSSSCG00000007448	OCSTAMP	1547.19	1.90044	0.105674	17.9839	7.92e-18	1.2e-14	2403.74	2609.18	2309.29	791.886	611.828	557.241
ENSSSCG00000024802	MACC1	155.995	1.91226	0.230795	8.28552	3.86e-05	0.01227	241.796	245.046	251.876	33.8976	69.2332	94.1214
ENSSSCG00000023525	TMEM26	280.925	1.92403	0.14605	13.1737	1.25e-10	6.84e-08	411.459	435.328	487.045	100.751	118.34	132.626
ENSSSCG00000012741	MAMLD1	48.1018	1.9251	0.366329	5.25511	0.00577956	1	49.7815	73.3281	105.377	30.1312	12.8806	17.113
ENSSSCG00000017730	CDK5R1	24.4822	1.92825	0.432994	4.45331	0.0160243	1	36.5742	39.9128	39.8375	7.5328	11.2705	11.7652
ENSSSCG00000004890	SERPINB2	257.515	1.9454	0.157434	12.3569	9.56e-10	5.02e-07	373.869	390.774	461.344	90.3936	101.435	127.278
ENSSSCG00000037087	PRRT4	60.3684	1.98198	0.293059	6.76309	0.000402883	0.114603	82.2919	102.102	104.091	18.832	21.736	33.1564
ENSSSCG00000007499	TFAP2C	24.6219	1.99492	0.430175	4.63746	0.0103662	1	39.622	39.9128	38.5524	10.3576	9.66045	9.62605
ENSSSCG00000024759	CX3CL1	12.5114	2.02101	0.611027	3.30757	0.047363	1	22.3509	18.5641	19.2762	2.8248	5.63526	6.41737
ENSSSCG00000031858	KCNJ10	27.0143	2.02464	0.424475	4.76976	0.00789123	1	46.7337	34.3435	48.833	9.416	8.85541	13.9043
ENSSSCG00000012026	ADAMTS1	112.601	2.05348	0.225537	9.10486	1.5e-06	0.00056845	186.935	142.015	215.893	42.372	43.472	44.9216
ENSSSCG00000001544	TEAD3	13.9143	2.05773	0.631299	3.25952	0.0469206	1	13.2073	26.9179	26.9867	9.416	1.61007	5.34781
ENSSSCG00000028741	DNMT3L	112.326	2.07055	0.214316	9.6612	2.94e-07	0.000118026	188.967	191.21	164.49	37.664	49.9123	41.7129
ENSSSCG00000015589	VASH2	28.2007	2.0714	0.408431	5.07159	0.00435545	0.861875	50.7975	40.841	44.9778	10.3576	10.4655	11.7652
ENSSSCG00000053304	gene_sourceensembl	31.4747	2.08011	0.449797	4.62457	0.00816759	1	77.2121	28.7743	46.2629	12.2408	7.24533	17.113
ENSSSCG00000014012	GFPT2	31.9125	2.13092	0.396934	5.36844	0.00219197	0.512104	47.7496	53.8358	53.9734	7.5328	11.2705	17.113
ENSSSCG00000059192	TM6SF2	21.9417	2.13888	0.491941	4.34783	0.0103047	1	35.5582	32.4871	39.8375	10.3576	11.2705	2.13912
ENSSSCG00000038929	CEMIP	831.71	2.14954	0.11782	18.2443	8.63e-23	1.68e-19	1242.51	1201.1	1629.48	318.261	289.813	309.103
ENSSSCG00000040681	FABP4	103.427	2.14989	0.226758	9.48099	1.98e-07	8.19e-05	179.823	155.01	170.916	43.3136	29.7864	41.7129
ENSSSCG00000009873	DTX1	119.86	2.16108	0.21758	9.93237	4.74e-08	2.02e-05	173.727	221.841	192.762	51.788	45.8871	33.1564
ENSSSCG00000011689	PLOD2	28.0329	2.22147	0.494374	4.49349	0.00674182	1	29.4625	38.0564	70.6794	3.7664	8.05037	18.1825
ENSSSCG00000005608	ANGPTL2	22.7728	2.26548	0.480481	4.71503	0.00422197	0.860399	27.4306	41.7692	43.6927	10.3576	4.83022	8.55649
ENSSSCG00000026043	TGM3	120.699	2.29702	0.216917	10.5894	1.12e-09	5.67e-07	172.711	202.348	226.174	38.6056	36.2267	48.1303
ENSSSCG00000022105	SUCNR1	20.6302	2.29835	0.508565	4.51928	0.0053405	1	30.4785	29.7025	42.4076	9.416	3.22015	8.55649
ENSSSCG00000036865	SDS	1895.33	2.30782	0.103112	22.3817	3.65e-37	4.98e-33	3021.43	3106.7	3337.35	710.908	693.942	501.624
ENSSSCG00000028878	BCAR1	48.9942	2.32232	0.343467	6.76141	5.91e-05	0.0183329	61.9729	76.1127	106.662	17.8904	12.0756	19.2521
ENSSSCG00000049017	gene_sourceensembl	294.175	2.33659	0.177101	13.1935	2.23e-14	1.79e-11	388.093	465.03	620.694	79.0944	103.045	109.095
ENSSSCG00000038420	PERP	10.2196	2.34097	0.698801	3.34998	0.0274961	1	21.3349	15.7795	14.1359	4.708	3.22015	2.13912
ENSSSCG00000017488	CSF3	1168.42	2.37592	0.119619	19.8624	6.41e-31	2.19e-27	1706.79	1799.79	2372.26	427.486	346.971	357.233
ENSSSCG00000028331	IL1R2	159.981	2.38947	0.208706	11.449	1.39e-11	9.05e-09	269.227	264.538	272.437	74.3864	41.8619	37.4346
ENSSSCG00000033657	GREM1	55.0809	2.41084	0.352835	6.83277	3.19e-05	0.0103579	98.5471	107.672	70.6794	11.2992	11.2705	31.0173
ENSSSCG00000039214	gene_sourceensembl	20199.8	2.42712	0.185406	13.0908	6.95e-15	6.78e-12	30179.8	31324.1	40692.1	6048.84	5593.4	7360.72
ENSSSCG00000011936	ZBED2	249.749	2.46405	0.184749	13.3373	1.14e-15	1.3e-12	376.917	389.846	503.751	56.496	99.8246	71.6606
ENSSSCG00000010724	HMX3	7.27737	2.50081	0.879655	2.84295	0.0440257	1	10.1595	6.49743	20.5613	3.7664	1.61007	1.06956
ENSSSCG00000011729	SCHIP1	13.7209	2.50832	0.629248	3.98621	0.00826463	1	23.3668	19.4923	26.9867	6.5912	1.61007	4.27825
ENSSSCG00000002737	CHST4	7.3417	2.55511	0.865365	2.95264	0.0361831	1	11.1754	7.42563	19.2762	1.8832	3.22015	1.06956
ENSSSCG00000009874	RASAL1	6.44963	2.56631	0.941653	2.72532	0.0481964	1	4.0638	11.1384	17.9911	2.8248	1.61007	1.06956
ENSSSCG00000039760	PRR16	7.51103	2.57895	0.89407	2.8845	0.0387273	1	4.0638	20.4205	14.1359	3.7664	1.61007	1.06956
ENSSSCG00000012066	KCNJ15	171.032	2.61762	0.190682	13.7277	1.09e-17	1.36e-14	259.067	289.6	334.121	51.788	46.6922	44.9216
ENSSSCG00000035859	WNT5A	9.00078	2.68592	0.791998	3.39133	0.0166413	1	16.2552	10.2102	20.5613	1.8832	4.02519	1.06956
ENSSSCG00000040961	LIF	69.8796	2.69916	0.297187	9.08236	5.41e-09	2.55e-06	126.994	97.4614	138.789	13.1824	19.3209	23.5303
ENSSSCG00000017044	IL12B	154.091	2.8802	0.247256	11.6486	1.43e-14	1.22e-11	202.174	245.974	364.963	40.4888	24.9562	45.9911
ENSSSCG00000002306	GALNT16	94.5325	3.06504	0.26276	11.6648	1.94e-15	2.03e-12	175.759	159.651	172.201	22.5984	24.1511	12.8347
ENSSSCG00000001682	DLK2	69.3132	3.34816	0.316928	10.5644	6.36e-14	4.82e-11	116.834	128.092	133.648	16.9488	9.66045	10.6956
